## **Phylobioactive hotspots identified through multidimensional profiling of botanical drugs used to treat Chagas disease in Bolivia and Dioscorides' De Materia Medica**

Andrea Salm<sup>1\*</sup>, Sandhya R. Krishnan<sup>1\*</sup>, Marta Collu<sup>1,2</sup>, Ombeline Danton<sup>3</sup>, Matthias Hamburger<sup>3</sup>,  
Marco Leonti<sup>2</sup>, Giovanna Almanza<sup>4</sup>, Jürg Gertsch<sup>1</sup>

<sup>1</sup>Institute of Biochemistry and Molecular Medicine, University of Bern, Switzerland, <sup>2</sup>Department of Science and Biomedicine, University of Cagliari, Italy, <sup>3</sup>Department of Pharmaceutical Sciences, University of Basel, Switzerland, <sup>4</sup>Instituto de Investigaciones Químicas, Universidad Mayor de San Andrés, Bolivia

\* authors contributed equally to the study

## Abstract

Globally, more than six million people are infected with *Trypanosoma cruzi*, the causative protozoan parasite of the vector-borne Chagas disease (CD). In Bolivia, CD is hyperendemic and a major health problem among indigenous communities. Although botanical drugs are used widely among different ethnic groups in Bolivia, studies challenging the hypothesis that effective antitrypanosomal medicinal agents were identified empirically are lacking. We conducted a cross-sectional ethnopharmacological field study in Bolivia among different ethnic groups in the Chaco, Chiquitanía and Inter-Andean valleys. We compared botanical drugs used in Bolivia in the context of CD with botanical drugs from unrelated indications from the Mediterranean *De Materia Medica* (*DMM*) compiled by Dioscorides two thousand years ago. A total of 775 ethyl acetate plant extracts with and without ethnomedical indications for CD treatment were profiled against *T. cruzi* epimastigote and procyclic *T. brucei* proliferation, parasite release from *T. cruzi* trypomastigote infected cells, as well as for host cell cytotoxicity *in vitro*. Inhibition of parasite release was monitored using a flow cytometry-based cellular assay. At 25 µg/mL, less than 5% of all extracts exhibited selective toxicity for *T. cruzi*. We found no evidence that ethnomedicine-inspired bioprospecting significantly increased the probability of finding selective antichagasic botanical drugs. The ethnomedical data further indicate a discrepancy between local and scientific concepts about CD among the studied ethnic groups. Intriguingly, the phylobioactive anthraquinone hotspot identified in this study matched the antichagasic activity of *Senna chloroclada*, the taxon with the strongest consensus for treating CD among the Izoceño-Guaraní. Selected antitrypanosomal plant extracts from *DMM* were subjected to HPLC-based activity profiling and targeted isolation of active compounds yielding sesquiterpene lactones, naphthoquinones and anthraquinones. Because the anthraquinone emodin selectively and potently inhibited *T. cruzi* in host cell infection, we performed a preliminary structure-activity relationship analysis for the 9,10-anthracenedione scaffold, exploring the impact of differential hydroxylation. This study shows that the multidimensional phylobioactivity-guided identification of antichagasic natural products enables comparative bioprospecting and is suitable to challenge ethnopharmacological hypotheses.

## Author summary

Chagas disease (CD) is a parasitic disease caused by the protozoan *Trypanosoma cruzi*. In Bolivia, CD is a major health problem among indigenous communities, which frequently use traditional medicine to treat the chronic symptoms of the disease related to cardiomyopathy. However, the ethnomedical context of the use of such remedies is largely unclear and it remains unknown whether the botanical drugs have any effect on parasitemia. In a field study among different ethnic groups in the Chaco, Chiquitanía and Inter-Andean valleys the authors collected ethnobotanical and ethnopharmacological information. Later, they profiled and compared the CD botanical drug extract library from Bolivia with a botanical drug extract library from the Mediterranean *De Materia Medica* with no association to CD. Using phylogenetic and biological information, they identified bioactive hotspots among different taxa and isolated antichagasic natural products. This led to a first structure-activity relationship study of the natural product class called anthraquinones. While there was no overall statistical difference between the libraries, it is noteworthy that the botanical drug derived from *Senna chloroclada* with the highest consensus among the Guaraní communities, also belonged to the anthraquinone cluster, potentially providing a molecular explanation for its use.

## Introduction

Chagas disease (CD) or American trypanosomiasis is the disease caused by infection of the haemoflagellate protozoan *Trypanosoma cruzi* (1). The parasitic *T. cruzi* is mainly transmitted to humans by hematophagous Reduviid bugs of the subfamily Triatominae (*Triatoma* spp.) (1–3). Other means of transmission involve blood transfusion, organ transplant, congenitally, and oral contamination (1,2). CD is classified as one of the most neglected tropical diseases, especially among low-income populations (4). The WHO estimates that about 6 to 7 million people are infected worldwide, primarily in Latin America, where the disease is endemic (5). Bolivia has the highest CD incidence in the world (6,7), and *T. cruzi* infection has a high prevalence in different rural areas, primarily affecting the indigenous communities in the Inter-Andean valleys and the Chaco (7–9).

CD presents two clinical phases. The acute stage of the disease (i.e. infection) remains often unperceived and only very rarely morbidity and mortality occur (10). In some cases, the sites of bug bites get inflamed and form nodules called chagoma or “Romaña sign” when the protozoan enters via the conjunctiva. After an incubation period of less than two weeks, newly infected individuals may develop fever, chills, myalgia, rash or meningeal irritation. However, the initial chagoma can remain the only indication of *T. cruzi* infection for years. At the chronic stage, parasitism and inflammation of the heart and/or enlarged colon can result in severe pathophysiological endpoints, including megacolon, megaesophagus and cardiomyopathy (11). Cardiomyopathy manifests as arrhythmias, congestive heart failure or sudden cardiac arrest. During the chronic phase, *T. cruzi* infection can present an indeterminate form, where, depending on the *T. cruzi* strain and possibly host immunity, approximately 70% of the infected individuals remain completely asymptomatic (2,3,12). Currently, there are two approved drugs that are used to treat acute CD, namely the nitroheterocyclic compounds nifurtimox (Lampit®) and benznidazole (Rochagan®). However, there is a controversy about their efficacy in chronic CD (13,14) and both drugs show adverse effects upon prolonged administration (15,16). Moreover, these antichagasic drugs are hardly accessible for the indigenous communities in Bolivia. Consequently, people living in rural areas of Bolivia rely on traditional medicines for their primary health care (17,18). Botanical drugs contribute significantly to Bolivian folk medicine and they are harvested wild, cultivated and traded at local markets (19). Despite reports making general claims about the efficacy of traditional botanical drugs (20), few studies address their mode of action based on comparative hypothesis-driven ethnopharmacological

research. It is unknown whether CD, which has a millennial history in the area (21), enforced a selection pressure to prompt ethnomedical strategies among the affected indigenous groups in Bolivia that directly reduce parasitemia or primarily treat the symptoms of CD.

Plants are known to produce a high diversity of secondary metabolites showing numerous pharmacological effects, including antiparasitic and antimicrobial (22,23). Medicinal plants have been shown to act via different mechanisms of action also against various causative agents of neglected tropical diseases like *Mycobacterium ulcerans* or *T. cruzi* (24–26). Plant secondary metabolites have led to the development of antiprotozoal chemotherapeutics, which include antimalarials such as the alkaloid quinine from *Cinchona* spp. (Rubiaceae) and the sesquiterpene lactone (SL) artemisinin from *Artemisia annua* L. (Asteraceae) (27). Ethnopharmacology inspires bioprospecting as it investigates treatment consensus of natural drugs among ethnic groups as anecdotal indications for presumed pharmacological efficacy (28,29). Considering Bolivia's rich biocultural diversity and the endemic nature of CD, ethnopharmacological and bioprospecting studies focusing on antichagasic remedies are surprisingly scarce (30–33). In parallel, few studies were dedicated to the ethnomedicine and management of CD in Bolivia (34,35). Although different plant extracts and natural products have been reported to exert moderate ( $IC_{50}$  values  $\leq 100$   $\mu\text{g}/\text{mL}$ ) to significant ( $15 \leq \mu\text{g}/\text{mL}$ ) selective toxicity towards *T. cruzi* epimastigotes (36–39), reports on activity against trypomastigote cellular infection and amastigote replication *in vitro* are relatively rare. Overall, systematic and comparative antitrypanosomal screenings with comprehensive extract libraries derived from botanical drugs are lacking, thus hindering a direct comparison of efficacy.

The aim of the present study was to conduct a cross-sectional ethnopharmacological study among the indigenous groups Quechua, Izoceño-Guaraní, Ayoreo and Chiquitano to investigate their prevalent ethnomedical strategies to treat CD in Bolivia. This included the documentation of the knowledge about botanical drugs used in treating CD-related symptoms. Fieldwork involved structured and semi-structured interviews, plant collections (drug samples and herbarium vouchers), and identification of the plant taxa used. An ethyl acetate (EtOAc) extract library of the botanical drugs used to treat CD was generated for *in vitro* testing against trypanosomes. To validate the ethno-directed bioprospecting approach, we also profiled *in vitro* antitrypanosomal effects of EtOAc extracts obtained from Mediterranean botanical drugs described in *De Materia Medica* (DMM), written by Dioscorides in the first century AD (40). We hypothesized that the CD botanical drug library would result in a comparatively higher number of extracts showing selective antichagasic activity *in vitro*. Using phylobioactivity-guided profiling in combination with HPLC-based activity profiling of active extracts we tested whether bioactive phylogenetic clusters can serve as a basis for the more efficient characterization of antichagasic plant metabolites. The DMM extract library yielded phylogenetic patterns of activity and different active hotspots could be identified representing chemotaxonomic associations. This multidimensional profiling resulted in a first preliminary structure-activity relationship (SAR) study on the antitrypanosomal effects of anthraquinones on parasite release upon host cell infection by trypomastigotes *in vitro*.

## Methods

### *Ethnopharmacological fieldwork*

The study was carried out among four indigenous groups (Quechua, Izoceño-Guaraní, Chiquitano and Ayoreo), settled in geographically distinct rural areas in Bolivia (Fig. 1). The surveyed Quechua communities were located in the Inter-Andean valleys between 3000 and 2200 m.a.s.l. in the municipality of Mizque (Cochabamba Department). The Guaraní in Bolivia live in the Chaco region, which is a semi-arid plain grassland, interspersed with swamps and thorny forests, that extends across southeast lowland Bolivia. In Bolivia, there are three subgroups of Guaraní (Ava, Simba and

Izoceño), marked by linguistic and historical differences. We visited communities of the Izoceño-Guaraní in the municipality of Charagua (Santa Cruz Department). The Chiquitano informants lived in the lowland Chiquitanía region situated in the Santa Cruz Department. This region is an ecologically transitional zone between the arid plains of the Chaco and the tropical rain forests. Today, Chiquitanos are native Spanish speakers. The survey was carried out in the Chiquitano communities in the municipalities of Concepción, San José de Chiquitos and Roboré. The Ayoreo groups used to live in the Chaco but have been sedentarized and acculturated by missionaries in the mid twentieth century. We surveyed Ayoreo communities situated in the Chiquitanía region (municipalities of Concepción, Pailón and San José de Chiquitos) and Ayoreo informants who lived in the city of Santa Cruz. All visited indigenous communities were small settlements located in rural areas characterized by a low population density. The main economic activity was subsistence farming. Traditional dwellings were predominantly constructed of adobe walls, earthen floors and thatched roofs, and constitute an ideal habitat for the CD vector *T. infestans* (41). *T. cruzi* transmission was hyperendemic showing the highest infection rates in the Chaco region and Inter-Andean valleys (42–46). Biomedical health care was mainly provided by primary health centers located in the bigger villages Charagua, La Brecha and Iyovi (Chaco), San José de Chiquitos, Roboré and Concepción (Chiquitanía), Mizque and Laguna Grande (Inter-Andean valleys). However, most of them were insufficiently equipped, and CD treatment was marginally successful (41). Additionally, a survey was conducted in the herbal markets of the cities of La Paz and Santa Cruz de la Sierra.

Fieldwork was carried out between June 2014 and May 2015 in all study sites during all vegetation periods. The survey was directed towards the management of CD related symptoms and associated knowledge. Before starting with the survey, the project was presented to the local authorities and to the communities (Fig. 1) during initial meetings for approval. Local research participants were randomly selected according to their availability, willingness and individual interest while each participant represented a distinct household. Interviews took place at the participants' home and were conducted in Spanish, or in their native language (Guaraní, Ayoreo, Quechua) with the assistance of a local translator. In the cities, we interviewed the medicinal plant vendors at the herbal markets from where we directly purchased the botanical drugs. Ethnomedical and ethnopharmacological information was obtained through structured and semi-structured interviews, free listing of remedies, observing practices *in situ* and by collecting plant material during walk-in-the-woods together with the participants. During interviews, representative photographs of chagoma were shown and symptoms of chronic CD (cardiomyopathy, megacolon, megaesophagus) described to the participants for eliciting focused responses. Questions targeted ethnomedical concepts related to CD and plant taxa used for treatment of acute and chronic symptoms. Vernacular plant names, parts used, dosage, mode of preparation and administration, provenance and availability were documented. Botanical voucher specimens were collected with the help of local informants, prepared and deposited at the National Herbarium in Bolivia (LPB) under the collection ID ASMPx. Botanical identification was carried out by specialists at LPB, and botanical names standardized in accordance with the [theplantlist.org](http://theplantlist.org) (47) and plant families following Angiosperm Phylogeny Group 4 (APG IV, 2016) (48). Data were analyzed with basic descriptive statistics such as the quantification of individual use reports cited by the informants according to current standards and recommendations (49).

### *Ethics statement*

Field research was approved by the Ministerio de Ambiente y Desarrollo Sostenible through a collaboration with the Instituto de Investigaciones Químicas The institutional review board (IRB) of the Universidad Mayor de San Andrés (UMSA FCPN) as part of the National Bioethics Committee approved the study. Oral consent was obtained from each research participant for treating personal

data and the recording of ethnomedical information. Community consent was documented on video or tape. Written consent at the time of the study was not feasible as the majority of participants were illiterate.

#### *Collection of botanical drugs mentioned in De Materia Medica*

Botanical drugs mentioned in *DMM* and associated voucher specimens were collected in several locations in Europe and the Mediterranean area, cultivated in domestic gardens or purchased from commercial suppliers between 2014 and 2016. Plant taxa were identified using the Flora Europea (50). Only those 660 botanical drugs, whose botanical description in *DMM* permitted a taxonomic identification (40) were collected. Prior to solvent extraction samples were dried at 40–60 °C. Herbarium voucher specimens were identified at the Department of Biomedical Science (University of Cagliari) and voucher specimens deposited at the Herbarium of the Botanical Garden of Geneva (Switzerland) and at the Herbarium of the National and Kapodistrian University of Athens (ATHU).

#### *Preparation of extracts*

Medicinal plant parts used in the context of CD were collected *in situ* and from the same collections herbarium voucher specimens were prepared. The clean plant materials (roots washed) were air-dried in the shade and stored dry in cotton bags at -20 °C prior to extraction. The extracts were generated as follows: Air-dried and powdered (0.5 mm) plant material was used for the preparation of semipolar extracts. The samples were exhaustively extracted by maceration with EtOAc (99.8%, Sigma Aldrich) at room temperature for 48 h. EtOAc (polarity index P = 4.4) was used based on its optimal extraction for secondary metabolites that are apolar to semipolar, excluding the highly polar constituents like sugars and polymers. Upon filtration (Whatman, 2.5 µm), samples were concentrated under reduced pressure on a rotary evaporator. The dried extracts were used to prepare stock solutions of 5 mg/mL in dry DMSO (≥99%, Sigma Aldrich) for subsequent use in *in vitro* assays. Crude extracts and DMSO stock solutions were stored at -20 °C.

#### *Biological assays*

##### *In vitro activity against T. cruzi epimastigotes*

Antitrypanosomal activity was first evaluated against epimastigotes of *T. cruzi* (Y strain obtained from ATCC) by the XTT assay (51,52). Since all known antichagasic agents show toxicity also against the epimastigote form, we used this screening as a preselective assay. Parasites were maintained in liver infusion tryptose medium (LIT) supplemented with 10% FBS (fetal bovine serum) at 27 °C, prepared according to the recommendations by ATCC. Epimastigotes in exponential growth phase were counted, adjusted to a concentration of  $1.5 \times 10^6$  parasites/mL, and exposed to 6 concentrations of each plant extract (in DMSO) ranging from 100 µg/mL to 0.8 µg/mL for 72 h at 27 °C. For the *DMM* library we chose a concentration of 25 µg/mL based on recommendations for the pure compounds (53). The assays were carried out in 96-well plates (200 µL/well). After 72 h of incubation, the plates were inspected under an inverted microscope to assure growth of the controls and sterile conditions. 50 µL of a XTT (Sigma Aldrich, MO, USA)/PMS (phenazine methosulfate, Sigma Aldrich, MO, USA) solution (0.5 mg XTT/0.025 mg PMS/mL in PBS) were added to the plates. The parasites were further incubated at 27 °C for 3 h. Then, methanol (50 µL/well) was added, and the plates were incubated for 10 min to fix the parasites. Absorbance was determined spectrophotometrically at 490 nm on a Tecan plate reader. DMSO was used as negative control, and benznidazole and nifurtimox (both Sigma Aldrich, Switzerland) were used as positive controls. Results were expressed as IC<sub>50</sub> and calculated by GraphPad Prism 5®. Each assay was carried out at least in three independent experiments each in triplicate.

##### *In vitro activity against procyclic T. brucei brucei*



The *T. b. brucei* procyclic form (427 strain) was cultured at 27 °C in SDM79 medium, supplemented with 5% FBS and hemin, as reported (54). Parasites in exponential growth phase were counted, adjusted to a concentration of  $1.0 \times 10^6$  parasites/mL and exposed to plant extracts for 72 h at 27 °C. The assays were carried out in 96-well plates (100  $\mu$ L/well). After 72 h of incubation, the plates were inspected under an inverted microscope to ensure growth of the controls and sterile conditions. 10  $\mu$ L MTT (5 mg/mL in PBS) were added to the plates. The cells were further incubated for 4 hours at 27 °C. After incubation the purple formazan precipitates were solubilized in DMSO (200  $\mu$ L/well). Absorbance was determined spectrophotometrically at 550 nm. DMSO was used as a negative, and nifurtimox as positive control. Results were expressed as IC<sub>50</sub> calculated by GraphPad Prism 5<sup>®</sup> from the sigmoidal concentration-response curve. Each assay was carried out in triplicate for the initial profiling.

#### *Cytotoxicity measurements in HeLa, CHO and Raw264.7 cells*

Cytotoxicity/antiproliferative assays were performed by the MTT method as reported previously (55). Immortalized hamster ovary CHO-K1 (ATCC<sup>®</sup> CCL-61<sup>™</sup>), human cervical HeLa (ATCC<sup>®</sup> CCL-2<sup>™</sup>) and mouse macrophage Raw264.7 (ATCC<sup>®</sup> TIB-71<sup>™</sup>) cells were cultured in RPMI-1640 medium supplemented with 10% FBS at 37 °C in 5% CO<sub>2</sub> atmosphere. Cells were counted and adjusted to a final concentration of  $2 \times 10^4$  cells/mL. 100  $\mu$ L were seeded in 96-well plates and incubated for 24 h at 37 °C with 5% CO<sub>2</sub>. Then, 100  $\mu$ L medium containing plant extracts at various concentrations (from 100  $\mu$ g/mL to 0.8  $\mu$ g/mL) were added. Plates were again incubated for 72 h at 37 °C with 5% CO<sub>2</sub>. After incubation, the plates were inspected under an inverted microscope to assure growth of the controls and sterile conditions. Medium was removed and 90  $\mu$ L fresh culture medium and 10  $\mu$ L MTT (5 mg/mL in PBS) were added to the each well. Plates were incubated for 4 hours at 37 °C with 5% CO<sub>2</sub>. Subsequently, the purple formazan precipitate was solubilized in DMSO (200  $\mu$ L/well) and absorbance determined spectrophotometrically at 550 nm. Cells cultured in absence of compounds were used as control of viability (negative control). Results were expressed as IC<sub>50</sub> or as % cell viability of negative control calculated with GraphPad Prism 5<sup>®</sup>. Each assay was carried out in triplicate in three independent experiments.

#### *Parasite release from trypomastigote-infected cells using flow cytometry*

The EtOAc extracts from the CD library and the active antitrypanosomal extracts from the *DMM* library were evaluated in an *in vitro* model of *T. cruzi* parasite release assay in CHO cells using analytical fluorescence activated cell scanning (FACS). In this assay, it was possible to simultaneously assess inhibition of growth and release of the parasite from infected host cells, which are relevant disease parameters. The host cells were cultured in RPMI-1640 medium supplemented with 10% FBS at 37 °C in 5% CO<sub>2</sub> atmosphere. Metacyclogenesis of epimastigotes (strain Y) was induced by Grace insect medium (Sigma Aldrich, MO, USA) supplemented with 10% FBS and hemin (25  $\mu$ g/mL, Sigma Aldrich, MO, USA). Trypomastigotes were generated by infecting CHO cells with metacyclic trypomastigotes harvested after 9 days of cultivation in Grace medium (56,57). Trypomastigotes of *T. cruzi* were obtained from the extracellular medium of infected CHO cells at day 5 post infection. CHO cells were counted and adjusted to a final concentration of  $8 \times 10^4$  cells/mL. 500  $\mu$ L were seeded in 24-well plates and incubated for 24 h at 37 °C with 5% CO<sub>2</sub>. Subsequently, cells were infected with trypomastigotes in fresh medium without FBS at a multiplicity of infection (MOI) of 1:10 and incubated at 37 °C in 5% CO<sub>2</sub> for 24 h. During this time, trypomastigotes were allowed to invade host cells. After infection, the medium containing non-internalized parasites was removed and cells were washed twice with PBS. 500  $\mu$ L of fresh RPMI medium without FBS containing plant extracts or controls (vehicle or benznidazole) were added. Plates were then incubated for 5 days at 37 °C with 5% CO<sub>2</sub>. After incubation, the plates were inspected under an inverted microscope to assure cell

viability and sterile conditions. To determine the antitrypanosomal effects, trypomastigotes (and residual amastigotes from burst cells) were collected from the extracellular medium and transferred into Eppendorf tubes. Infected CHO cells were washed twice with PBS and the washing PBS was collected in the tubes containing the released parasites. Parasites were pelleted and resuspended in PBS and incubated with 50 nM SYTO9 (S34854) dye for 30 min at 37 °C with 5% CO<sub>2</sub>. Following this, the parasites were fixed using 4% PFA in PBS for 2 h at RT. A relative quantitation of the released parasite population was done via fluorescence-associated cell sorting (FACS) on a FACScan (BD Biosciences) equipped with a solid-state laser (Cytek, Cambridge, UK) at 485 nm excitation and 535 nm emission (FL1). Each plate also contained non-infected untreated controls (blanks: 0% released parasites), infected untreated controls (negative control: 100% released parasite) and reference controls (positive control: benznidazole at 20 µM). Results were expressed as % released parasites compared to the negative control. Each assay was carried out in three independent experiments each in triplicates.

### *Biosafety*

Experimental work with live *T. cruzi* were carried out following standard operating procedures in compliance with biosafety level 3\* regulations (BSL3\*) approved by the safety authorities of the University and Canton of Bern, Switzerland: The Standard Operational Procedures of the experiments were reported to the Swiss Authority Federal Office of Public Health (BAG).

### *Comparison of EtOAc plant extract libraries*

Hit rates were defined and calculated for both the Bolivian CD and the *DMM* extract libraries. For host cell cytotoxicity, the hit criterion was > 50% HeLa growth inhibition at 25 µg/mL (72 h incubation). The hit criterion for antichagasic activity was > 50% *T. cruzi* epimastigote growth inhibition at 25 µg/mL (72 h incubation). The criterion for potentially selective antichagasic activity was > 50% *T. cruzi* epimastigote growth inhibition at 25 µg/mL and < 50% inhibition of HeLa or CHO cellular proliferation at 25 µg/mL. The null hypothesis of the statistical test was that no relationship exists on the categorical variables (probability of hits) in the equally heterogeneous (genera and families) extract libraries, which were independent and with a reasonable sample size (>100 and <700). Results related to general cytotoxicity and selective antichagasic effects were compared with the X<sup>2</sup> test and *P*-values were calculated. A *P*-value < 0.05 was considered as statistically significant. We investigated the phylogenetic distribution of plant species with the ggtree package (36) in the R environment Version 3.5.0 (<http://www.R-project.org/>).

### *Microfractionation, bioactivity-guided isolation and structure elucidation*

General Experimental Procedures. Optical rotations were measured in chloroform or methanol on a Jasco P-2000 digital polarimeter (Tokyo, Japan) with a 10 cm microcell. Nuclear magnetic resonance (NMR) spectra were recorded on a Bruker AVANCE III 500 MHz spectrometer (Billerica, CA, USA) operating at 500.13 MHz for <sup>1</sup>H and 125.77 MHz for <sup>13</sup>C. Measurements were performed with a 1 mm TXI probe at 18 °C. Data were processed with Bruker TopSpin 3.5 software. HR-ESIMS data were recorded in positive ion mode on a Thermo Scientific Orbitrap LQT XL mass spectrometer (Waltham, MA, USA). Centrifugal partition chromatography (CPC) was performed on an Armen Instrument (AlphaCrom, Rheinfelden, Switzerland) with coil volume 100 mL connected to a Varian pump model 210 (Agilent technologies, Santa Clara, CA, USA), a Varian 218 UV detector and a Varian fraction collector (model 704). Preparative reversed-phase high performance liquid chromatography (RP-HPLC) was carried out on a Puriflash 4100 system (Interchim, Montluçon, France) with a Waters (Milford, MA, USA) SunFire Prep C18 OBD column (5µm, 30 × 150mm i.d., guard column 10 × 20 mm i.d.). Semipreparative RP-HPLC was performed on an Agilent 1100 Series instrument with a DAD detector (Santa Clara, CA, USA) and a Waters (Milford, MA, USA) SunFire C18 column (5 µm, 150 × 10



mm i.d., guard column 10 × 10 mm i.d.). An HPLC system consisting of degasser, binary mixing pump, autosampler, column oven, and a diode array detector (all Shimadzu, Kyoto, Japan) connected via a T-splitter to an Alltech 3300 ELSD detector (Büchi, Flawil, Switzerland) and a Shimadzu 8030 triple quadrupole MS system with ESI and APCI interfaces was used for HPLC analysis. Data acquisition and processing were performed with LabSolution software (Kyoto, Japan). Separations were achieved with a SunFire C18 column (3.5 µm, 150 × 3.0 mm i.d., guard column 10 mm × 3.0 mm i.d.) (Waters, Milford, MA, USA). Microfractionation was carried out on the same instrument, but with a FC 204 fraction collector (Gilson, Middleton WI, USA) connected instead of the MS. Microfractions were collected into 96-deepwell plates. HPLC grade acetonitrile (Macron Fine Chemicals, Avantor Performance Materials, Phillipsburg, NJ, USA) and water from a Milli-Q water purification system (Merck, Darmstadt, Germany), and formic acid from Merck were used for HPLC separations. NMR spectra were recorded in DMSO-d<sub>6</sub>, methanol-d<sub>4</sub> or chloroform-d (Armar Chemicals, Döttingen, Switzerland).

Microfractionation and isolation of natural products from selected extracts was carried out for subsequent testing on epimastigote viability/proliferation (72 h incubation assay) and in the parasite release assay. For microfractionation, extracts were dissolved in DMSO (10 mg/mL) and separated by gradient HPLC [0.1% aq. formic acid (A), 0.1% formic acid in acetonitrile (MeCN) (B); 0–30 min (5–100 % B); flow rate 0.4 mL/min; injection volume 4 × 30 µL; room temperature]. Optimized gradients were used for *Laurus nobilis* leaf extract [0–5 min (5–30 % B), 5–30 min (30–100 % B)] and *Sium sisarum* root extract [0–5 min (5–40 % B), 5–30 min (40–1000 % B)]. One-minute fractions were collected in 96-deep-well plates. Plates were dried in a Genevac EZ-2 evaporator (Ipswich, UK), and microfractions in wells redissolved in DMSO prior to bioassays. Compounds in the active time windows were isolated as follows: 200.6 mg of EtOAc extract of *Rumex crispus* rhizome were submitted to preparative RP-HPLC [water (A), MeCN (B); 0–15 min (40–60 % B), 15–30 min (60 % B), 30–50 min (60–100 % B); flow rate 20 mL/min; injection volume 2 × 2 mL; room temperature] afforded compounds nepodin (28.2 mg, t<sub>R</sub> 19.3 min), torachryson (2.7 mg, t<sub>R</sub> 23.9 min), emodin (1.67 mg, t<sub>R</sub> 24.7 min), and chrysophanol (8.0 mg, t<sub>R</sub> 38.9 min). 24.0 mg of EtOAc extract of *S. sisarum* roots were purified by semipreparative RP-HPLC [water (A), MeCN (B); 0–5 min (5–40 % B), 5–20 min (40–70 % B), 20–30 min (70 % B); flow rate 4 mL/min; injection volume 3 × 400 µL; room temperature] to yield faltarindiol (7.1 mg, t<sub>R</sub> 21.8 min). 30.0 mg of EtOAc extract of *Rheum rhaponticum* roots were separated by semipreparative RP-HPLC [water (A), MeCN (B); 0–20 min (5–60 % B), 20–30 min (60 % B); flow rate 4 mL/min; injection volume 3 × 500 µL; room temperature] to afford (6R, 7S)-costunolide (1.1 mg, t<sub>R</sub> 26.3 min). 2.0 g of *L. nobilis* leaf extract were separated by CPC [Hexane/EtOAc/MeOH/water, 7/3/5/5, v/v/v/v]; 0–60 min (descending mode), 60–72 min (ascending mode); flow rate 5 mL/min; rotation 2000 rpm; injection volume 10 mL]. Separation was monitored by the HPLC gradient mentioned above and detection at 210 nm. Active compounds were in fractions F2 (18–20 min), F6 (46–49 min), F9 (67–72 min). These fractions were further purified by semipreparative RP-HPLC [water (A), MeCN (B); flow rate 4 mL/min; injection volume 3 × 500 µL; room temperature]. F2 (32.0 mg) [0–45 min (25 % B)] yielded compounds (+)-reynosin (3.8 mg, t<sub>R</sub> 26.6 min), zaluzanin C (1.6 mg, t<sub>R</sub> 29.2 min), and santamarine (2.7 mg, t<sub>R</sub> 39.7 min). F6 (13.0 mg) [0–30 min (42 % B)] afforded (3S)-3-acetylzaluzanin C (4.2 mg, t<sub>R</sub> 23.8 min), and F9 (44.0 mg) [0–30 min (40–65 % B)] yielded costunolide (14.1 mg, t<sub>R</sub> 21.9 min), dehydrocostus lactone (5.3 mg, t<sub>R</sub> 23.7 min), and eremanthin (2.4 mg, t<sub>R</sub> 24.7 min).

*Nepodin*: amorphous solid; HR-ESI-MS m/z 217.0850 [M + H]<sup>+</sup> (calcd for C<sub>13</sub>H<sub>13</sub>O<sub>3</sub><sup>+</sup>, 217.0859).

*Torachryson*: amorphous solid; HR-ESI-MS m/z 247.0963 [M + H]<sup>+</sup> (calcd for C<sub>14</sub>H<sub>15</sub>O<sub>4</sub><sup>+</sup>, 247.0965).

*Emodin*: amorphous solid; HR-ESI-MS m/z 271.0598 [M + H]<sup>+</sup> (calcd for C<sub>15</sub>H<sub>11</sub>O<sub>5</sub><sup>+</sup>, 271.0601).

*Chrysophanol*: amorphous solid; HR-ESI-MS m/z 255.0649 [M + H]<sup>+</sup> (calcd for C<sub>15</sub>H<sub>11</sub>O<sub>4</sub><sup>+</sup>, 255.0652).

(3*R*, 8*S*)-*Falcarindiol*: oil; [α]<sub>D</sub><sup>25</sup> +285 (0.1, CHCl<sub>3</sub>); APCI-MS m/z 262 [M + H]<sup>+</sup>.

(6*R*, 7*S*)-*Costunolide*: amorphous solid; [α]<sub>D</sub><sup>25</sup> +108 (0.1, CHCl<sub>3</sub>); HR-ESI-MS m/z 233.1527 [M + H]<sup>+</sup> (calcd for C<sub>15</sub>H<sub>21</sub>O<sub>2</sub><sup>+</sup>, 233.1536).

(+)-*Reynosin*: amorphous solid; [α]<sub>D</sub><sup>25</sup> +59 (0.2, CH<sub>3</sub>OH); ESI-MS m/z 249 [M + H]<sup>+</sup>.

*Zaluzanin C*: amorphous solid; [α]<sub>D</sub><sup>25</sup> +37 (0.1, CHCl<sub>3</sub>); ESI-MS m/z 247 [M + H]<sup>+</sup>.

*Santamarine*: amorphous solid; [α]<sub>D</sub><sup>25</sup> +83 (0.1, CH<sub>3</sub>OH); ESI-MS m/z 249 [M + H]<sup>+</sup>.

(3*S*)-3-*acetylzaluzanin C*: amorphous solid; [α]<sub>D</sub><sup>25</sup> +15 (0.1, CHCl<sub>3</sub>); ESI-MS m/z 289 [M + H]<sup>+</sup>.

*Dehydrocostus lactone*: amorphous solid; [α]<sub>D</sub><sup>25</sup> -6 (0.1, CHCl<sub>3</sub>); ESI-MS m/z 231 [M + H]<sup>+</sup>.

*Eremanthin*: amorphous solid; [α]<sub>D</sub><sup>25</sup> -276 (0.1, CHCl<sub>3</sub>); ESI-MS m/z 231 [M + H]<sup>+</sup>.

For the SAR analysis with 9,10-anthracenedione, the following commercial compounds were purchased (≥95% purity). Anthraquinone (**1**), alizarin (**4**), alizarin RedS (**5**), quinizarin (**6**), anthrarufin (**7**), anthraflavic acid (**9**), emodin (**2**), purpurin (**3**), rhein (**15**), diacerein (**16**), chrysophanol (**10**), disperse Red11 (**17**) and dantron (**8**) were all obtained from Sigma Aldrich, Switzerland. Aloe emodin (**11**), physcion (**12**), 2-hydroxy-3-methylantraquinone (**13**) and 2-hydroxy-1-methylantraquinone (**14**) were obtained from Toronto Research Chemical, ON, Canada. Aurantio obtusin (**18**) was obtained from AdooQ Biosciences LLC, CA, USA.

## Results

### *Ethnopharmacological survey in Bolivia*

Ethnomedical data were obtained from a total of 361 informants in three different geographic areas representing four ethnic groups (Fig. 1). In total, 152 research participants (5 Ayoreo, 68 Chiquitano, 54 Izoceño-Guaraní, 19 Quechua and 6 sellers from the city markets) reported ethnomedical knowledge related to the treatment of CD (Table 1). In our study, the gender of the informants was uniformly distributed, and we were not able to detect gender-specific knowledge related to the treatment of CD. When asked about CD and its symptoms, informants of all ethnic groups showed a lack of ethnomedical knowledge related to the pathophysiology of CD. Unlike other disease categories, such as dermatological affections or diseases of the digestive system, chronic CD was recognized unambiguously only after diagnosis by blood tests in the health centers or hospitals. Symptoms related to cardiomyopathies (general fatigue, shortness of breath, dizziness, chest pain, heart palpitations, high blood pressure and swelling of feet and legs) were generally associated to CD among the Chiquitano and Izoceño-Guaraní. Botanical drugs used for CD were most frequently associated with these symptoms. The survey resulted in more than 350 use reports for 79 plant taxa used in the context of CD (Table 2). Of these, 69 were identified to the species level, 9 plants were identified to the genus level, and one taxon was identified only to the family level. The recorded remedies comprised plant taxa distributed across 37 botanical families and 74 genera (Table 2). From the plants identified to the species level, 80% were native to Bolivia. Only 41 medicinal plant species (52%) were collected wild, while the others were obtained through cultivation or from local markets. Decoctions and infusions in cold and hot water, respectively, were the most common preparation forms for oral administration. Informants reported that the chronic symptoms were relieved after taking these plant remedies. The most cited plant species to be effective in the treatment of symptoms related to CD were *Senna chloroclada* (flowers, root) (Fig. 3) and *Tabebuia aurea* (bark), followed by the introduced and globally known medicinal plant species *Alpinia zerumbet* (rhizome) and *Cymbopogon citratus* (herb) (Table 2). Noteworthy, Chiquitano informants also reported a blend of several botanical drugs against CD, such as a combination of the barks of *Jacaranda cuspidifolia*, *T. aurea* and *Trichilia* sp. Particularly interesting in the context of this study was that few informants stated that certain botanical drugs could cure chronic CD, namely *S. chloroclada* (flowers, root), *Cochlospermum tetraporum* (bark, leaves) and *Bulnesia bonariensis* (bark). However, there was no consensus among independent informants. Even during prolonged stays, the use of these remedies was observed rarely by the authors. Only the use of *Galphimia brasiliensis* (root) (Fig. 3) could be repeatedly observed among the Chiquitano. To treat triatomine bites, topical application as poultices were mentioned (Table 2). Informants agreed that acute symptoms and inflammatory swellings (chagoma) at the bite sites occurred very rarely. Nocturnal triatomine bites were considered common and harmless. In highly affected communities (Izoceño-Guaraní and Ayoreo) informants stated that the bites were irritating but not painful and therefore remained mostly untreated. Only the taxa *Aloe vera*, *Croton* sp. and *Verbesina* sp were reported to be used for triatomine bites. *Bauhinia* sp., *S. chloroclada* and *Parthenium hysterophorus* were mentioned as a treatment of fever during first infections (Table 2). Besides plant based remedies, eleven Chiquitano informants reported the use of animal products, such as *Coragyps atratus* (black vulture; blood), *Tapirus* sp. (tapir; nails) and *Equus africanus asinus* (donkey; milk) to treat the chronic symptoms of CD. Few Izoceño-Guaraní informants also reported the use of grease of armadillos (*Dasypoda* spp.) against triatomine bites, and others applied alcohol topically. The plant taxa used for CD obtained in markets were common medicinal plants known to be used for a variety of diseases and ailments (Table 2).

The Quechua and Ayoreo reported relatively fewer remedies to manage CD as compared to the Izoceño-Guaraní and Chiquitano (Table 1), despite the high prevalence of CD in their communities (>

40%; Fig. 2). The vast majority of the Ayoreo interviewed in this study did not report any botanical drugs used in the context of CD (Fig. 2). The visited Ayoreo communities were evangelic or catholic Christians that stopped practicing shamanism decades ago. Generally, they had no or little knowledge about traditional medicinal agents. Although Quechua informants have been educated on the association between triatomine bugs and CD by institutional anti-CD campaigns (41), they had a very limited understanding about the transmission mechanisms and symptoms of the illness. There was poor consensus among Quechua informants and we obtained only one or two use-reports for each plant taxon, with the exception of *Minthostachys ovata* aerial parts (3 use-reports, Table 2). Most of the reported plants used by the Quechua were native to the region (86% of the total number of identified taxa at species level) and were gathered from the wild (74%). Among the Quechua, traditional healers (curanderos) generally carried out the preparation of botanical drugs. Although there were specialized healers among the Izoceño-Guaraní (paye) and Chiquitano communities, the knowledge and use of botanical drugs was not restricted to them. Guaraní and Chiquitano community members used botanical drugs to alleviate CD-associated symptoms because they lacked alternatives, and ethnomedical remedies were easily accessible. Especially in the Guaraní communities there was a general lack of primary health care, and travelling to Santa Cruz posed significant difficulties for patients.

### **Analysis of plant libraries**

#### *Biological profiling of CD botanical drug library, collected in Bolivia*

Crude EtOAc extracts obtained from 115 botanical drugs, representing 79 plant species and collected on the basis of their use in the management of CD (Table 2), were dissolved in DMSO and tested *in vitro* for their antitrypanosomal activity against *T. cruzi* epimastigotes and procyclic *T. b. brucei*, as well as for general cytotoxic effects in HeLa and Raw264.7 cells. Antiproliferative IC<sub>50</sub> values < 25 µg/mL were considered biologically significant. To define selective hits, a cutoff of 50% inhibition (HeLa antiproliferative effect) at 25 µg/mL was used. IC<sub>50</sub> values were determined only for selective hits. Supplementary Table S1 summarizes the results obtained in the *in vitro* bioassays with the plant extracts. Phylogenetic distribution of reported anti-CD plant taxa and screening results are shown in Fig. 4. In general, the *T. b. brucei* strain was very sensitive towards the tested extracts and, rather surprisingly, 90 extracts (78%) exhibited antitrypanosomal activity against procyclic *T. b. brucei* (Fig. 4). In contrast, only 20 (17%) extracts inhibited *T. cruzi* epimastigotes with IC<sub>50</sub> values ≤ 25 µg/mL. Seven extracts (6%) showed pronounced (IC<sub>50</sub> < 10 µg/mL) and 13 extracts (10%) good (IC<sub>50</sub> ≤ 25 µg/mL) antitrypanosomal activity (Fig. 4). The most potent extracts were those of *Cynara* sp. aerial parts (2 µg/mL), *Acanthostyles buniifolius* aerial parts (2 µg/mL) and *Gochnatia boliviana* leaves (4 µg/mL) (Fig. 4). The extracts from roots and flowers of *S. chloroclada*, the most frequently cited anti-CD botanical drugs among the Guaraní, were not active against epimastigotes (IC<sub>50</sub> > 50 µg/mL), while an extract of the aerial parts of this plant was moderately active. The *S. chloroclada* flower extract showed significant inhibitory effects on parasite release in the infection assay (15 µg/mL were equally effective as 20 µM of benznidazole) without being cytotoxic to host cells (Suppl. Table S1). The ESI-MS scan and a positive TLC Borntrager reaction indicated that this plant contained anthraquinones and possibly anthrones and its glycosides. Since many extracts exhibited significant general cytotoxicity (Fig. 4), the observed toxicity against epimastigotes could also be due to non-specific effects. Moreover, cytotoxic extracts (27.8%) could not be analyzed in the trypanomastigote infection assay. Particularly cytotoxic extracts were from *Ambrosia arborescens* leaves, *G. boliviana* leaves, *G. boliviana* branches, *Bocconia integrifolia* leaves, *B. integrifolia* roots, *Cynara* sp. aerial parts, and *P. hysterophorus* aerial parts. The only highly active and selective antitrypanosomal extracts were from *Pterodon* sp. seeds, *Sonchus oleraceus* leaves, *A. buniifolius* aerial parts, *Aloysia*

*polystachya* aerial parts and *Gloxinia gymnostoma* aerial parts (Fig. 4). The extracts of these taxa showed also significant inhibitory effects in the *T. cruzi* infection assay (Suppl. Table S1).

As initial IC<sub>50</sub> values were obtained in anti-proliferation assays with *T. cruzi* epimastigotes, we next screened the extracts lacking general cytotoxicity in the cellular infection assay. In order to validate the antitrypanosomal activity on the mammalian stage forms that are relevant for the disease, extracts were tested for their ability to inhibit *T. cruzi* parasite release assay in CHO cells. Amastigotes develop intracellularly, differentiate into trypomastigotes and leave the host cell. Here we quantified the amount of trypomastigotes released (and residual amastigotes in case cells burst prematurely). To that aim, we developed a versatile FACS-based assay by staining released parasites in supernatant using a DNA stain. Benznidazole was used to validate the assay system (Fig. 5). Although the assay showed significant variability ( $\pm 30\%$ ), due to the nature of independent *T. cruzi* infections and overall variability in replication efficiencies, a reliable IC<sub>50</sub> value for benznidazole could be obtained ( $2 \pm 0.4 \mu\text{M}$ ), which was in agreement with previously published data (58). Consequently, we employed this assay for our profiling of the CD botanical drug library, whereby initial testing of the extracts was performed at a single concentration (15  $\mu\text{g}/\text{mL}$ ). As shown in Table 1S, extracts which were active against *T. cruzi* epimastigotes were generally also active in the infection assay, with the exception of *S. chloroclada*. The pre-screening with epimastigotes was thus considered suitable for the discovery of antichagasic compounds able to inhibit different stages of the infection/replication cycle.

#### *Comparative profiling of the DMM library from the Mediterranean*

To validate the ethno-directed approach for bioprospecting antichagasic activity, we compared the results obtained for botanical drugs used in a CD context with those of 660 botanical drugs described in Dioscorides' *DMM*. Importantly, the botanical drugs mentioned in *DMM* show no traditional association with CD. EtOAc extracts were tested at 25  $\mu\text{g}/\text{mL}$  *in vitro* against *T. cruzi* epimastigotes, and on HeLa cells for cytotoxicity (Fig. 6, Suppl. Table 2S). The extracts were considered active (i.e. hits) when the percentage of inhibition was  $\geq 50\%$  at 25  $\mu\text{g}/\text{mL}$ . A total of 59 (8.9%) extracts exhibited antitrypanosomal activity while 102 (15.5%) extracts were cytotoxic towards HeLa cells (Fig. 6; Suppl. Table 2S). Among the antitrypanosomal hits, only 27 extracts (4.1%) were selectively toxic for *T. cruzi* epimastigotes. Extracts with apparent selectivity were those obtained from *Levisticum officinale* fruits, *Opopanax chironium* roots, *Glebionis coronaria* flowers, *Tanacetum parthenium* flowers, *Convolvulus scammonia* roots, *Iris foetidissima* seeds, *Laurus nobilis* fruits, *Rheum rhaponticum* roots, *Rumex crispus* roots and *Ruta chalepensis* roots. Extracts with selective toxicity for *T. cruzi* epimastigotes were considered potential hits and their antichagasic activity was subsequently determined at 15  $\mu\text{g}/\text{mL}$  in the trypomastigote infection assay in CHO cells. All extracts with the exception of those obtained from *A. vera* resin, *L. nobilis* leaves and *L. albus* roots were also active in the infection assay ( $> 50\%$  inhibition of parasite release at 15  $\mu\text{g}/\text{mL}$ ).

#### *Comparison of extract libraries derived from different ethnopharmacological contexts*

In an attempt to pharmacologically validate the ethno-directed approach, hit rates were calculated for both the CD and *DMM* botanical drug libraries. The Pearson X<sup>2</sup> test was applied for statistics. Results show that there is a significantly higher probability (17.4% vs. 8.9%,  $P = 0.0057$ ) of detecting antichagasic (*T. cruzi* epimastigotes) extracts when the plant had a reported use against CD. However, we also found a significantly higher percentage of cytotoxic (IC<sub>50</sub>  $\leq 25 \mu\text{g}/\text{mL}$ ) extracts among CD botanical drugs (27.8% vs. 15.5%,  $P = 0.0012$ ). Taking the importance of selectivity into account, the hit rate of selective antichagasic extracts *in vitro* was not considered statistically different ( $P = 0.079$ ) between the Bolivian CD (7.8%) and the *DMM* (4.1%) extract libraries. The two libraries shared 20 genera and included the identical species *S. oleraceus*, *Spartium junceum*, *A. vera*,



*Linum usitatissimum* and *R. chalepensis* (Suppl. Tables 1S and 2S). Only *S. oleraceus* and *S. junceum* aerial parts were also identical botanical drugs.

### **Microfractionation of selected extracts and identification of antitrypanosomal natural products**

For the isolation of potentially antichagasic metabolites related to the DMM library, active extracts from different phylogenetic clusters were selected (Fig. 6). A major phylogenetic hotspot showing trypanocidal selectivity was the 'anthraquinone cluster' with *R. crispus* (curly dock) and *R. rhaponticum* (rhapontic rhubarb) rhizomes from the Polygonaceae family (Fig. 6). As anticipated, anthraquinones and naphthoquinones were major active principles in *R. crispus* (Fig. 7) and *R. rhaponticum* (not shown). The latter also yielded the SL (6*R*, 7*S*)-costunolide. *L. nobilis* (bay) leaves from the Lauraceae family were also studied. Noteworthy, all plant parts of *L. nobilis* showed significant antichagasic effects (Suppl. Table S2). The *L. nobilis* leaf extract, which inhibited epimastigote proliferation but was inactive in the infection assay, yielded the known SLs (+)-reynosin, zaluzanin C, santamarine, (3*S*)-3-acetylzaluzanin C, dehydrocostus lactone and eremanthin. Since all of these SLs showed antiproliferative effects in CHO cells (Table 3) we tested them in the infection assay at the subcytotoxic concentration of 5  $\mu$ M only (Table 3). *Sium sisarum* root (skirret) from the Apiaceae family showed overall good antichagasic selectivity. However, phytochemical annotation in this case was more complex, since the polyacetylene (3*R*, 8*S*)-falcarindiol, a major metabolite from *S. sisarum*, was isolated but inactive in all assays. As illustrated with *R. crispus*, the most potent antichagasic principle was the anthraquinone emodin which completely inhibited *T. cruzi* epimastigote proliferation during the bioactivity-guided isolation and also inhibited parasite release (Fig. 7 and Table 3). Nepodin from *R. crispus* inhibited epimastigote proliferation ( $IC_{50} = 28.7 \pm 13.3$   $\mu$ M) but was not equally efficacious in inhibiting the parasite release in the infection assay (~30% inhibition at 5  $\mu$ M).

### **Impact of 9,10-anthracenedione substitutions on antichagasic effects in vitro**

Emodin (**2**), which was representative for the anthraquinone cluster, moderately inhibited *T. cruzi* epimastigote growth and significantly inhibited parasite release in the cellular infection assay without being cytotoxic to host cells up to 100  $\mu$ M (selectivity index of 200 (Table 3)). We therefore performed a preliminary structure-activity relationship (SAR) study on the 9,10-anthracenedione (**1**) scaffold (Table 4). Both the inhibition of epimastigote proliferation and parasite release were measured. Our data indicate that the position of the hydroxyl groups was important for the antichagasic activity *in vitro*, with the trihydroxy-substituted derivatives being the most active (Table 5). The canonical anthraquinone (**1**) was ineffective against epimastigotes, and only very marginally active against cellular parasite release at 0.5  $\mu$ M. Hydroxylation at R1/R2 (**4**) abolished this activity. Hydroxylation at R2/R6 (**9**) did not significantly improve activity of **1** in the infection assay. Likewise, the additional hydroxymethyl moiety at R3 found in aloe emodin (**11**) did not improve the activity in the infection assay but increased general cytotoxicity. Interestingly, hydroxylation at R1/R8 showed a trend towards general increase in toxicity towards epimastigotes (**2**, **8**, **10-12**). An acidic functional group (COOH) at R2 abolished the antichagasic activity as indicated by the lack of activity of rhein (**15**) and its clinically used anti-rheumatic prodrug diacerein (**16**) (see Table 5). The replacement of hydroxyl groups with methoxy and methyl groups generally led to a decrease in activity as shown by compounds **12** and **18**. Thus, 9,10-anthracenedione with hydroxyl groups at positions R1 and R3 or R4, as exemplified by compounds **2**, **3** and **6**, proved to be most active in the infection assay, but did not inhibit proliferation of epimastigotes. We also determined the long-term cytotoxicity (72 h incubation) towards host cells for the anthraquinones most effectively inhibiting *T. cruzi* parasite release in CHO cells (**2,3,6,14**). Noteworthy, all anthraquinones were cytotoxic only at higher micromolar concentrations, with the exception of quinizarin, which showed an  $IC_{50}$  value of  $38 \pm 16$   $\mu$ M. In this study, emodin (**2**) was the most potent antichagasic 9,10-anthracenedione in all stages of



*T. cruzi*, followed by purpurin (3), which inhibited 50% ( $52.5 \pm 14.4$ ) of cellular parasite release at 0.5  $\mu\text{M}$ .

## Discussion

### ***Biological profiling of plant extracts and assessment of the ethno-directed approach***

In the present study we document the current knowledge about botanical drugs used to manage CD by the indigenous peoples Ayoreo, Chiquitano, Izoceño-Guaraní and Quechua in Bolivia. A major aim was to use this information for bioprospecting for anti-CD drugs. Previous studies reported better antimicrobial properties of extracts derived from botanical drugs selected based on popular uses related to microbial infections (59–61). Such studies lend credit to the ethno-directed approach in bioprospecting for specific bioactive metabolites. In order to challenge this approach, we tested a total of 775 EtOAc extracts from two independent botanical drug libraries generated from 115 taxa selected for their reported use against symptoms of CD in Bolivia and from 660 taxa described in *DMM*. Although the ethnomedical extraction generally proceeded with hot water infusions, we justify the use of EtOAc for extract preparation by the reduced extraction of polar and high molecular weight compounds, such as sugars and tannins, which would potentially interfere with the screening. Our findings indicate that the CD botanical drug library contains a significantly higher percentage of cytotoxic plant taxa. However, hit rates for selectively antichagasic plant extracts in the two libraries were not significantly different. The overall higher hit rate among the CD library was possibly due to non-specific cytotoxic effects, which could be conditioned by the ecological factors prevailing in the Chaco and Inter-Andean valleys. The extreme atmospheric and ecological conditions (altitude, extreme dryness and high temperature ranges) in these regions may favor the production of metabolites with broad-spectrum toxic or general antifeedant properties.

Among the indigenous peoples participating in this study, the biomedical concept of CD was only recently introduced and did not match with any existing traditional disease concept. This seems related to the fact that infection with *T. cruzi* shows a diffuse and varied disease pattern, and is asymptomatic in the majority of cases. We found that the majority of the botanical drug preparations intended for oral use (aqueous decoctions and infusions) were used to relieve symptoms associated with the chronic phase of CD, such as cardiac complications, fever and fatigue, and not for combatting the (invisible) parasites. In fact, most of the botanical drugs applied for CD related symptoms were also used for other therapeutic purposes involving inflammatory conditions (Table 2). We thus conclude that tangible ethnomedical concepts about CD were absent until recently and developed only during the last decades, which is in agreement with the cultural perception of *T. cruzi* vectors (41). This clearly hampers the application and selection of botanical drugs targeting *T. cruzi* parasitemia and its symptoms, and probably explains in part why the majority (> 80%) of the extracts derived from botanical drugs with reported use against CD and its symptoms were not active. The use of plant- and animal-based traditional medicine among the Chiquitano, Izoceño-Guaraní and Quechua was widespread and in agreement with previous reports that these people widely use traditional medicine despite the presence of Western healthcare (18,62). Noteworthy, the Ayoreo did not treat CD at all, which is in agreement with their overall very limited use of herbal medicine. Chiquitano, Izoceño-Guaraní and Quechua research participants stated that they tried to manage CD with plant-based remedies because Western health care was limited, and chemotherapy not accessible during the chronic stage of CD. Another study from a different region in Bolivia reported a similar situation (34). Asteraceae was the most dominant family of plants used for CD, likely due to their overall abundance and species richness. In general, Asteraceae are over-proportionally represented in medical floras (63–65), and this may be linked to the high diversity of bioactive secondary metabolites in the family (63). Quechua informants showed a low consensus regarding the

species to be used in the treatment of CD with only one species mentioned three times. A higher consensus was found among the Chiquitano and Izoceño-Guaraní participants (estimated Trotter and Logan Informants' consensus:  $Fic > 0.8$ ) with relatively few species being used by a large proportion of participants. Among the Izoceño-Guaraní *S. chloroclada* (referred to as lanza lanza, mbuijare or retama) was clearly the most important species for treating CD, with a share of 48% of total use-reports. Interestingly, *S. chloroclada* belonged to a phylogenetic cluster that showed no or little inhibition of epimastigote proliferation in the pre-screening (Fig. 4), but exhibited significant antichagasic effects in the parasite release assay (79.5% inhibition at 15  $\mu\text{g}/\text{mL}$  by EtOAc extract of flower). This discrepancy was also observed with some anthraquinones (purpurin and quinizarin). Since the extract likely contains glycosides that may be hydrolyzed by CHO cells but not by epimastigotes, we cannot exclude metabolic changes induced by host cells. The genus *Senna* (syn. *Cassia*) is known to contain anthraquinone, dianthrone and naphthol glycosides (66). A preliminary ESI-MS scan analysis and the Borntrager reaction confirmed the presence of anthraquinones (physicon and chrysophanol) in this botanical drug (supplementary Fig. S1). To date, no in-depth phytochemical study is available on *S. chloroclada*, and follow-up studies are planned in our laboratory. *T. aurea* bark as its Spanish vernacular name "paratodo" indicates, was used for numerous diseases, in agreement with a previous study (67). The introduced species *A. zerumbet* and *C. citratus* are well known in South America for the treatment of cardiovascular diseases (67–70). An apparently specific medicinal indication for CD was also reported for several species mentioned by our research participants, such as *Aloysia citridora*, *Baccharis genistelloides*, *Bixa orellana*, *Dysphania ambrosioides*, *Handroanthus impetiginosus*, *L. usitatissimum*, *Plantago major*, *Ruta chalepensis*, *S. chloroclada*, *S. junceum* and *Schinus molle* (17,34,35,71–76). None of the EtOAc extracts obtained from botanical drugs of these species were significantly and selectively toxic against *T. cruzi* in our infection assay with the exception of *S. chloroclada* (flowers) inhibiting parasite release  $> 50\%$  *in vitro* at 15  $\mu\text{g}/\text{mL}$  (Suppl. Table S1) but not showing any effect on epimastigotes.

The extract obtained from the aerial parts of *A. buniifolius* (Fig. 3) had a SI  $> 20$  and was the other noteworthy hit obtained with the CD informed library. It fully inhibited epimastigote proliferation at 25  $\mu\text{g}/\text{mL}$  and parasite release at 15  $\mu\text{g}/\text{mL}$ . Its antichagasic and antileishmanial activity was previously reported for plant material collected in Argentina, and the flavonoid santin was thought to be the active compound (77). However, santin was only moderately active against *T. cruzi* epimastigotes and trypomastigotes ( $\text{IC}_{50}$  values  $> 30 \mu\text{M}$ ). Clearly, the presence of additional antichagasic metabolites should not be excluded, and an in-depth phytochemical investigation of *A. buniifolius* is warranted. The extract of seeds of a *Pterodon* sp. showed significant and apparently specific antitrypanosomal effects. Whether the very common diterpene alcohol geranylgeraniol previously identified as the major antichagasic component in *Pterodon pubescens* seeds (78) is responsible for this specific antitrypanosomal activity remains to be clarified.

The screening of the *DMM* extract library resulted in 23 extracts with selective parasite toxicity in the *T. cruzi* release assay. Of these extracts, eight were from Apiaceae and seven from Asteraceae showing taxonomic parallels with the CD-informed library. In both libraries, Asteraceae was the largest family. Asteraceae are known to frequently contain SLs with antiprotozoal properties (79,80) (*vide infra*). It is possible that the use of SL containing botanical drugs could therefore represent an ethnopharmacological strategy to reduce parasitemia in CD. The 660 extracts representing the *DMM* library were obtained from 389 different plant species. The largest part are from the Mediterranean basin, but central European species and exotic herbal drugs imported from Africa, Arabia, Central Asia, Himalaya and the Indo-Malayan region are also included. The families with the highest share of botanical drugs and species are Apiaceae with 69 botanical drugs from 37 spp., Asteraceae with 51 botanical drugs from 33 spp., Rosaceae with 37 botanical drugs from 18 spp., Lamiaceae with 33 botanical drugs from 26 spp. and Fabaceae with 29 botanical drugs from 22 spp. This pattern reflects

the overall taxonomic composition of *DMM* for which a total of 536 plant taxa representing 924 botanical drugs were identified and recommended for 5314 medical applications (40). The medical categories with the most therapeutic uses are dermatology (1216), gastroenterology (805), gynecology (615), urology (437), respiratory system (374) and neurology (269). The most frequently mentioned parasite treatments are related to lice, scabies and tapeworms but also applications for malaria causing infections with *Plasmodium* were described (tertian and quartan fever) such as all parts of *Anchusa* sp., seed and leaves of *Bituminaria bituminosa*, root of *Dipsacus fullonum*, seeds of *Heliotropium europaeum*, root of *Plantago* sp., herb of *Potentilla reptans* and the herb of *Verbena officinalis* (40). With respect to the overall Mediterranean flora the Apiaceae and Rosaceae appear to be overrepresented in this library, while the frequency of Asteraceae and Lamiaceae appears to be rather consistent with the overall species diversity and abundance. Apiaceae fruits were frequently used as antidotes, and their resins for neurological and musculoskeletal problems. Considering the size of plant families, the Fabaceae seem underrepresented, while Poaceae, Caryophyllaceae and Orchidaceae are clearly underrepresented in the *DMM* library (Suppl. Table 2S; (40,50)). With respect to the treatment of fevers and parasites, the active extracts from plants belonging to the 'cumarin cluster', such as the herb of rue (*R. chalepensis*) were recommended in *DMM* for the internal use of the treatment of tremor and shivering prior to fever attacks while the seeds of *Seseli tortuosum* against fevers in general. The hits belonging to the 'anthraquinone cluster', such as the roots of *Rumex* species and rhubarb (*Rheum* spp.) were recommended for the treatments of scabies and fevers, respectively. For *L. officinale*, *L. nobilis* and *S. sisarum* no uses related to fever and parasites are recorded in *DMM* (40).

#### **Microfractionation and isolation of bioactive principles of selected antichagasic plant taxa from the *DMM* library**

For the isolation of active compounds from the *DMM* library we selected extracts pertaining to three different phylogenetic groups, with taxa whose plant material was readily accessible. A major phylogenetic hotspot showing apparent antitrypanosomal selectivity was the anthraquinone cluster with the rhizomes of *R. crispus* (curly dock) and *R. rhaponticum* (rhapontic rhubarb) from the Polygonaceae family. The anthraquinones emodin and chrysophanol were identified in *R. crispus* and served as a basis for the subsequent preliminary SAR study (*vide infra*). Since the naphthoquinone derivative nepodin with known antimalarial activity (75) was isolated together with anthraquinones from *R. crispus* and likewise inhibited epimastigote proliferation, the potency of the extract may reflect additive effects. In general, naphthoquinones have been studied extensively in *T. cruzi* epimastigotes (81,82) without leading to a successful translation to clinical trials (83). Extracts with antitrypanosomal activity from plants with distinct phylogenetic positions were those from *L. nobilis* (bay) (Lauraceae) and *S. sisarum* (skirret; Apiaceae). *L. nobilis* leaves contain a range of SLs which may explain the significant antichagasic effects of its extract in epimastigotes. Numerous studies have addressed the selective versus non-selective antitrypanosomal effects of SLs which are also widely present in Asteraceae (84–86). SLs like cynaropicrin and others can act as electrophiles and form adducts with biological nucleophiles, such as trypanothione, the parasitic equivalent of glutathione in mammalian cells (26,87). The reason why *L. nobilis* (leaves) was ineffective in the infection assay could be due to the SLs reacting with thiols in host cells, e.g. glutathione, without reaching the parasite. It has been shown that CHO cells can produce glutathione upon stress (88). Thus, SLs undergoing a Michael-type addition with thiols are likely poorly bioavailable to infected tissues as they are detoxified by glutathione. Although the polyacetylene faltarindiol from *S. sisarum* had no inhibitory effect on *T. cruzi*, we cannot exclude the possibility that other polyacetylenes present in *S. sisarum* root may be more potent as indicated by the activity profile of the extract.

#### **SAR study of anthraquinones as antichagasic natural products in vitro**

Antraquinones are condensed aromatic hydrocarbons found in different plant species known for their medical and dye applications (89). In Western pharmacopoeias, anthraquinone containing botanical drugs, such as *Rhamnus* spp. (Frangulae cortex and Rhamni purshiani cortex) or *Rheum officinale* (Rhei radix) are used as laxatives. The 9,10-anthracenedione scaffold, if bioavailable to the infected cells, could interfere with the parasite redox system as this scaffold can mediate the production of hydrogen peroxide or reactive oxygen species (ROS) via oxygen reduction *in situ* (90). Anthraquinones have been shown to interfere with redox reactions in cells (91). ROS generation is also the postulated mode of action of the approved antichagasic drug benznidazole (92). However, further studies will be necessary to uncover the underlying mode of action. To elaborate on our natural product drug discovery approach, the most active antichagasic secondary metabolite emodin (1,3,8-trihydroxy-6-methylanthracene-9, 10-dione) led us to explore in more detail the SAR of differentially substituted 9,10-anthracenediones. Trihydroxylated anthraquinones have already been shown to be trypanocidal (*vide infra*), but this study provides a first preliminary SAR study on 9,10-anthracenediones for both *T. cruzi* epimastigote and parasite release from trypomastigote infected CHO cells. Different anthraquinones have been shown to exert moderate to good antimalarial, antibacterial and antiviral effects *in vitro* at low micromolar concentrations (93). In our study, emodin showed specific submicromolar inhibition of parasite release in CHO cells. Emodin was previously only tested on epimastigotes at high micromolar concentrations (94) where it inhibited casein kinase 1 with an IC<sub>50</sub> value of 130 µM (95), thus significantly less potent than in the trypomastigote infection assay shown here. Other reported effects of this natural product include antiinflammatory, antiosteoporosis, and antidepressant effects (93). Purpurin, a natural trihydroxylated anthraquinone, inhibited parasite release and showed a selectivity index > 100. Rather unexpectedly, it did not inhibit epimastigote proliferation, which may be due to differences in pH between lysosomes and culture medium related to the trypanosomal uptake of anthraquinones. Purpurin has previously been shown to inhibit blood-stream trypomastigotes (96), but was not studied in cellular infection assays. Since anthraquinone glycosides in plant extracts can be deglycosylated and reduced to anthrones and anthranols by gut bacteria (97), resulting in potent laxative effects, the systemic application of these compounds can be challenging. However, as exemplified by the drug diacerein (prodrug of rhein), low micromolar plasma concentrations can be achieved (98). Unfortunately, rhein showed no antitrypanosomal effects in our assays, possibly due to the carboxylic acid at C2. It is noteworthy that the most important botanical drug used in the context of CD among the Guaraní also contains anthraquinones, thus giving strong support to the anthraquinone cluster being of potential relevance in the treatment of CD.

Overall, the comparative phylobioactivity-guided screening for *in vitro* antichagasic activity is an enabling tool in the discovery of natural products that may have a potential in CD drug development. The comparative profiling was further suitable for a pharmacological validation of a library with botanical drugs currently used in the context of CD in Bolivia, thus challenging the ethno-directed CD bioprospecting approach. Moreover, our study led to the identification of biologically significant antichagasic phylogenetic hotspots that will serve for subsequent phytochemical investigations.

### Acknowledgements

This study was funded by the EU Marie Curie Actions Initial Training Network (ITN) MedPlant (medplant.eu). We would like to acknowledge the Guaraní, Ayoreo, Chiquitano and Quechua informants who agreed to participate in the research, and the members of the communities for their hospitality and interest. Rossy Chávez de Michel and Stephan Beck from the National Herbarium Bolivia (LPB) identified the herbarium specimens. We thank Yonny Flores, Alberto Giménez and Efrain Salamanca (Universidad Mayor de San Andres) for technical assistance in the lab in Bolivia and for introducing the handling of *T. cruzi*. We acknowledge Matthias Rubin (University of Bern) for

technical assistance in the lab and Peter Staub (Unica) for collecting *DMM* plant material and Laura Casu (Unica) for production of extracts. We thank Peter Bütikofer (University of Bern) for sharing the *T. brucei* strain and giving advice on its culturing.

## References

1. Pérez-Molina JA, Molina I. Chagas disease. *Lancet*. 2018;391(12):82–94.
2. Coura JR, Borges-Pereira J. Chagas disease: 100 years after its discovery. A systemic review. *Acta Trop* [Internet]. 2010 Jul;115(1–2):5–13. Available from: <http://linkinghub.elsevier.com/retrieve/pii/S0001706X10000884>
3. Barrett MP, Burchmore RJ, Stich A, Lazzari JO, Frasch AC, Cazzulo JJ, et al. The trypanosomiasis. *Lancet* [Internet]. 2003 Nov;362(9394):1469–80. Available from: <http://linkinghub.elsevier.com/retrieve/pii/S0140673603146946>
4. Conteh L, Engels T, Molyneux DH. Socioeconomic aspects of neglected tropical diseases. *Lancet* [Internet]. 2010;375:239–47. Available from: [http://dx.doi.org/10.1016/S0140-6736\(09\)61422-7](http://dx.doi.org/10.1016/S0140-6736(09)61422-7)
5. World Health Organization. Chagas disease (American trypanosomiasis) [Internet]. 2018. Available from: [http://www.who.int/news-room/fact-sheets/detail/chagas-disease-\(american-trypanosomiasis\)](http://www.who.int/news-room/fact-sheets/detail/chagas-disease-(american-trypanosomiasis))
6. World Health Organization. Chagas disease in Latin America: an epidemiological update based on 2010 estimates. *Wkly Epidemiol Rec*. 2015;6(90):33–44.
7. Organización Panamericana de la Salud. Estimación cuantitativa de la enfermedad de Chagas en las Americas. OPS/HDM/CD/425-06 Organización Panamericana de la Salud. Montevideo, Uruguay; 2006.
8. Araújo-Jorge TC de, Medrano-Mercado N. Chagas disease in Bolivia: a brief review of the urban phenomena. *Rev Biomédica* [Internet]. 2009;20(3):236–44. Available from: <http://www.revbiomed.uady.mx/pdf/rb092038.pdf>
9. Cassab JRA, Noireau F, Guillén G. La Enfermedad de Chagas en Bolivia - Conocimientos científicos al inicio del Programa de Control (1998-2002). La Paz, Bolivia: Ministerio de Salud y Previsión Social; 1999. 127–133 p.
10. Teixeira ARL, Nascimento RJ, Sturm NR. Evolution and pathology in Chagas disease - A Review. *Mem Inst Oswaldo Cruz*. 2006;101(5):463–91.
11. Jr AR, Rassi A, Marin-neto JA. Seminar Chagas disease. 2010;
12. Ribeiro AL, Nunes MP, Teixeira MM, Rocha MOC. Diagnosis and management of Chagas disease and cardiomyopathy. *Nat Rev Cardiol* [Internet]. 2012 Jul 31;9(10):576–89. Available from: <http://www.nature.com/doi/10.1038/nrcardio.2012.109>
13. Coura JR, Castro SL de. A Critical Review on Chagas Disease Chemotherapy. *Mem Inst Oswaldo Cruz* [Internet]. 2002 Jan;97(1):3–24. Available from: [http://www.scielo.br/scielo.php?script=sci\\_arttext&pid=S0074-02762002000100001&lng=en&tlng=en](http://www.scielo.br/scielo.php?script=sci_arttext&pid=S0074-02762002000100001&lng=en&tlng=en)



14. Marin-Neto JA, Rassi Jr A, Avezum Jr A, Mattos AC, Rassi A. The BENEFIT trial: testing the hypothesis that trypanocidal therapy is beneficial. *Mem Inst Oswaldo Cruz, Rio Janeiro*. 2009;104:319–24.
15. Castro JA, DeMecca MM, Bartel LC. Toxic Side Effects of Drugs Used to Treat Chagas' Disease (American Trypanosomiasis). *Hum Exp Toxicol* [Internet]. 2006 Aug 2;25(8):471–9. Available from: <http://journals.sagepub.com/doi/10.1191/0960327106het653oa>
16. Jackson Y, Alirol E, Getaz L, Wolff H, Combescure C, Chappuis F. Tolerance and Safety of Nifurtimox in Patients with Chronic Chagas Disease. *Clin Infect Dis* [Internet]. 2010;51(10):e69–75. Available from: <https://academic.oup.com/cid/article-lookup/doi/10.1086/656917>
17. Quiroga R, Meneses L, Bussmann RW. Medicinal ethnobotany in Huacareta (Chuquisaca, Bolivia). *J Ethnobiol Ethnomed*. 2012;
18. Vandebroek I, Thomas E, Sanca S, Van Damme P, Van L Van, De Kimpe N. Comparison of health conditions treated with traditional and biomedical health care in a Quechua community in rural Bolivia. *J Ethnobiol Ethnomed*. 2008;4:1.
19. Bussmann RW, Paniagua Zambrana NY, Moya Huanca LA, Hart R. Changing markets – Medicinal plants in the markets of La Paz and El Alto, Bolivia. *J Ethnopharmacol* [Internet]. 2016;193:76–95. Available from: <http://dx.doi.org/10.1016/j.jep.2016.07.074>
20. Cordell GA, Colvard MD. Some thoughts on the future of ethnopharmacology. *J Ethnopharmacol*. 2005;100(1–2):5–14.
21. Aufderheide AC, Salo W, Madden M, Streitz J, Buikstra J, Guhl F, et al. A 9,000-year record of Chagas' disease. *Proc Natl Acad Sci U S A*. 2004;101(7):2034–9.
22. Wink M. Medicinal plants: A source of anti-parasitic secondary metabolites. *Molecules*. 2012;17(11):12771–91.
23. Newman DJ, Cragg GM. Natural Products as Sources of New Drugs from 1981 to 2014. *J Nat Prod*. 2016;79(3):629–61.
24. Tsouh Fokou PV, Nyarko AK, Appiah-Opong R, Tchokouaha Yamthe LR, Ofosuhene M, Boyom FF. Update on Medicinal Plants with Potency on *Mycobacterium ulcerans*. *Biomed Res Int*. 2015;2015.
25. Llurba Montesino N, Kaiser M, Brun R, Schmidt TJ. Search for antiprotozoal activity in herbal medicinal preparations; new natural leads against neglected tropical diseases. *Molecules*. 2015;20(8):14118–38.
26. Zimmermann S, Oufir M, Leroux A, Krauth-Siegel RL, Becker K, Kaiser M, et al. Cynaropicrin targets the trypanothione redox system in *Trypanosoma brucei*. *Bioorganic Med Chem* [Internet]. 2013;21(22):7202–9. Available from: <http://dx.doi.org/10.1016/j.bmc.2013.08.052>
27. Cheuka PM, Mayoka G, Mutai P, Chibale K. The role of natural products in drug discovery and development against neglected tropical diseases. *Molecules*. 2017;22(1).
28. Buenz EJ, Verpoorte R, Bauer BA. The Ethnopharmacologic Contribution to Bioprospecting Natural Products. *Annu Rev Pharmacol Toxicol*. 2018;58(1):509–30.
29. Trotter RT, Logan MH. Informant consensus: a new approach for identifying potentially effective medicinal plants. New York: Ed. Bedfore Hills; 1986. 91–112 p.
30. Calderón Ál, Romero LI, Ortega-Barría E, Solís PN, Zacchino S, Gimenez A, et al. Screening of Latin American plants for antiparasitic activities against malaria, Chagas disease, and



- leishmaniasis. *Pharm Biol.* 2010;48(5):545–53.
31. Fournet A, Barrios AA, Muñoz V. Leishmanicidal and trypanocidal activities of Bolivian medicinal plants. *J Ethnopharmacol.* 1994;41(1–2):19–37.
  32. Muñoz Ortiz V, Duchén Uriarte EP, Wagner F, Ferreira ME, Serna E, Torrez S, et al. Actividad tripanocida in vitro e in vivo de extractos etanólicos de algunas plantas medicinales bolivianas. In vitro and in vivo trypanocidal activity, of ethanolic extracts from some bolivian medicinal plants. *Biofarbo.* 2010;18(1):69–75.
  33. Rojas de Arias A, Inchausti A, Ascurrat M, Fleitas N, Rodríguez E, Fournet A. In vitro activity and mutagenicity of bisbenzylisoquinolines and quinones against *Trypanosoma cruzi* trypomastigotes. *Phyther Res.* 1994;8(3):141–4.
  34. Forsyth C. From Lemongrass to Ivermectin: Ethnomedical Management of Chagas Disease in Tropical Bolivia. *Med Anthropol [Internet].* 2017; Available from: <https://www.tandfonline.com/doi/full/10.1080/01459740.2017.1360878>
  35. Bastien J. *The Kiss of Death: Chagas' disease in the Americas.* Salt Lake City: The University of Utah Press; 1998.
  36. Izumi E, Ueda-Nakamura T, Dias Filho BP, Veiga Júnior VF, Nakamura CV. Natural products and Chagas' disease: A review of plant compounds studied for activity against *Trypanosoma cruzi*. *Nat Prod Rep.* 2011;28(4):809–23.
  37. Muschietti L V, Ulloa JL. Natural sesquiterpene lactones as potential Trypanocidal and Leishmanicidal agents. *Nat Prod Commun.* 2016;11(10):1569–78.
  38. Schmidt T, Khalid S, Romanha A, Alves T, Biavatti M, Brun R, et al. The potential of secondary metabolites from plants as drugs or leads against protozoan neglected diseases - part I. *Curr Med Chem.* 2012;19(14):2128–75.
  39. Schmidt T, Khalid S, Romanha A, Alves T, Biavatti M, Brun R, et al. The potential of secondary metabolites from plants as drugs or leads against protozoan neglected diseases - part II. *Curr Med Chem.* 2012;19(14):2176–228.
  40. Staub PO, Casu L, Leonti M. Back to the roots: A quantitative survey of herbal drugs in Dioscorides' *De Materia Medica* (ex Matthioli, 1568). *Phytomedicine [Internet].* 2016;23(10):1043–52. Available from: <http://dx.doi.org/10.1016/j.phymed.2016.06.016>
  41. Salm A, Gertsch J. Cultural perception of triatomine bugs and Chagas disease in Bolivia: a cross-sectional field study. *Parasites and Vectors [Internet].* 2019;12(291). Available from: <https://doi.org/10.1186/s13071-019-3546-0>
  42. Brenière SF, Bosseno MF, Noireau F, Yacsik N, Liegeard P, Aznar C, et al. Integrate Study of a Bolivian Population Infected by *Trypanosoma cruzi*, the Agent of Chagas Disease. *Mem Inst Oswaldo Cruz.* 2002;97(3):289–95.
  43. Chippaux J-P, Postigo JR, Santalla JA, Schneider D, Brutus L. Epidemiological evaluation of Chagas disease in a rural area of southern Bolivia. *Trans R Soc Trop Med Hyg [Internet].* 2008 Jun;102(6):578–84. Available from: <http://www.ncbi.nlm.nih.gov/pubmed/18430443>
  44. Samuels AM, Clark EH, Galdos-Cardenas G, Wiegand RE, Ferrufino L, Menacho S, et al. Epidemiology of and Impact of Insecticide Spraying on Chagas Disease in Communities in the Bolivian Chaco. McCall PJ, editor. *PLoS Negl Trop Dis [Internet].* 2013 Aug 1;7(8):e2358. Available from: <http://dx.plos.org/10.1371/journal.pntd.0002358>
  45. Ministerio de Salud. *Revista Epidemiologica [Internet].* La Paz, Bolivia; 2015. Available from: [https://www.minsalud.gob.bo/images/Libros/epidemiologia/Revista-Epidemiologica\\_opt.pdf](https://www.minsalud.gob.bo/images/Libros/epidemiologia/Revista-Epidemiologica_opt.pdf)

46. Gürtler RE. Sustainability of vector control strategies in the Gran Chaco Region: current challenges and possible approaches. *Mem Inst Oswaldo Cruz*. 2009;104(1):52–9.
47. The Plant List, Version 1.1 [Internet]. 2013 [cited 2019 Oct 17]. Available from: [www.theplantlist.org](http://www.theplantlist.org)
48. The Angiosperm Phylogeny Group., Chase MW, Christenhusz MJM, Fay MF, Byng JW, Judd WS, et al. An update of the Angiosperm Phylogeny Group classification for the orders and families of flowering plants: APG IV. *Bot J Linn Soc*. 2016;181(1):1–20.
49. Weckerle CS, de Boer HJ, Puri RK, van Andel T, Bussmann RW, Leonti M. Recommended standards for conducting and reporting ethnopharmacological field studies. *J Ethnopharmacol* [Internet]. 2018;210(July 2017):125–32. Available from: <http://dx.doi.org/10.1016/j.jep.2017.08.018>
50. Tutin TG, Burges NA, Chater AO, Edmonson JR, Heywood VH, Moore DM, et al. *Flora Europaea I (2nd Edition) and Flora Europaea II–V*. Cambridge: Cambridge University Press;
51. Salamanca Capusiri E, Ruiz Pinell G, Ticona Huallpara JC, Giménez Turba A. Método colorimétrico - XTT: como evaluación de alto rendimiento de sustancias con actividad leishmanicida. *Biofarbo* [Internet]. 2008;16:21–7. Available from: <http://www.revistasbolivianas.org.bo/pdf/rbfb/v16n1/v16n1a05.pdf>
52. Benabdelaziz I, Gómez-Ruiz S, Benkhaled M, Carralero S, Schenker P, Salm A, et al. New cycloartane-type ester triterpenes from *Euphorbia pterococca* and biological evaluation. *Fitoterapia* [Internet]. 2018;127(February):271–8. Available from: <http://linkinghub.elsevier.com/retrieve/pii/S0367326X18300303>
53. Don R, Ioset JR. Screening strategies to identify new chemical diversity for drug development to treat kinetoplastid infections. *Parasitology*. 2014;141(1):140–6.
54. Brun R, Schonenberger M. Cultivation and in vitro cloning of procyclic culture forms of *Trypanosoma brucei* in a semi-defined medium. Short communication. *Acta Trop*. 1979;36(3):289–92.
55. Gertsch J, Thöni Tobler R, Brun R, Sticher O, Heilmann J. Antifungal, antiprotozoal, cytotoxic and piscicidal properties of justicidin B and a new aryl-naphthalide lignan from *Phyllanthus piscatorum*. *Planta Med*. 2003;69(5):420–4.
56. Muelas-Serrano S, Le-Senne A, Fernández-Portillo C, Nogal JJ, Ochoa C, Gómez-Barrio A. In Vitro and in Vivo Anti-*Trypanosoma cruzi* Activity of a Novel Nitro-derivative. *Mem Inst Oswaldo Cruz, Rio Janeiro* [Internet]. 2002 [cited 2017 Jun 14];97(4):553–7. Available from: <http://www.scielo.br/pdf/mioc/v97n4/4461.pdf>
57. Sullivan JJ. Metacyclogenesis *cruzi* in vitro: a simplified procedure. *Trans R Soc Trop Med Hyg*. 1982;76(3):300–3.
58. Da Silva CF, Junqueira A, Lima MM, Romanha AJ, Sales Junior PA, Stephens CE, et al. In vitro trypanocidal activity of DB745B and other novel arylimidamides against *Trypanosoma cruzi*. *J Antimicrob Chemother*. 2011;66(6):1295–7.
59. Oliveira Silva AC, Fonseca Santana E, Saraiva AM, Neves Coutinho F, Acre Castro RH, Caetano Pisciotto MN, et al. Which Approach Is More Effective in the Selection of Plants with Antimicrobial Activity? Evidence-based Complement Altern Med. 2013;2013.
60. Svetaz L, Zuljan F, Derita M, Petenatti E, Tamayo G, Cáceres A, et al. Value of the ethnomedical information for the discovery of plants with antifungal properties. A survey among seven Latin American countries. *J Ethnopharmacol*. 2010;127(1):137–58.

61. Khafagi IK, Dewedar A. The efficiency of random versus ethno-directed research in the evaluation of Sinai medicinal plants for bioactive compounds. *J Ethnopharmacol*. 2000;71(3):365–76.
62. Quiroga R, Arrázola S. Etnobotánica médica en cuatro etnias de las tierras bajas de Bolivia: un enfoque comparativo Medicinal ethnobotany in four ethnic groups of the Bolivian lowlands: a comparative approach. Vol. 7, *Revista de la Sociedad Boliviana de Botánica*. 2013.
63. Heinrich M, Robles M, West JE, Ortiz de Montellano BR, Rodriguez E. Ethnopharmacology of Mexican Asteraceae (Compositae). *Annu Rev Pharmacol Toxicol* [Internet]. 1998;38(1):539–65. Available from: <http://www.annualreviews.org/doi/10.1146/annurev.pharmtox.38.1.539>
64. Moerman DE, Pemberton RW, Kiefer D, Berlin B. A Comparative Analysis of five medicinal floras. *J Ethnobiol* [Internet]. 1999;19(1):49–67. Available from: <https://ethnobiology.org/sites/default/files/pdfs/JoE/19-1/Moerman-etal.pdf>
65. Thomas E, Vandebroek I, Sanca S, Van Damme P. Cultural significance of medicinal plant families and species among Quechua farmers in Apillapampa, Bolivia. *J Ethnopharmacol*. 2009;122(1):60–7.
66. Dave H, Ledwani L. A review on anthraquinones isolated from Cassia species and their applications. *Indian J Nat Prod Resour*. 2012;3(3):291–319.
67. Hajdu Z, Hohmann J. An ethnopharmacological survey of the traditional medicine utilized in the community of Porvenir, Bajo Paraguá Indian Reservation, Bolivia. *J Ethnopharmacol* [Internet]. 2012;139(3):838–57. Available from: <http://dx.doi.org/10.1016/j.jep.2011.12.029>
68. Moreira F V., Bastos JFA, Blank AF, Alves PB, Santos MR V. Chemical composition and cardiovascular effects induced by the essential oil of *Cymbopogon citratus* DC. Stapf, Poaceae, in rats. *Rev Bras Farmacogn*. 2010;20(6):904–9.
69. Lim TK. Edible Medicinal and Non-Medicinal Plants. In: *Edible Medicinal and Non-Medicinal Plants*. 2016. p. 196–213.
70. Luz AIR, Maia JGS, Silva ML, Zoghbi MGB, Ramos LS. Essential Oils of Some Amazonian Zingiberaceae, 3. Genera *Alpinia* and *Rengalmia*. *J Nat Prod*. 1984;47(5):907–8.
71. Martínez MR, Pochettino ML, Cortella AR. Environment and illness in the Calchaquí Valley (Salta, Argentina): Phytotherapy for osteo-articular and cardio-circulatory diseases. *J Ethnopharmacol*. 2004;95(2–3):317–27.
72. Report TD. Technical Data Report for CARQUEJA (*Baccharis genistelloides*). 2002; Available from: <http://www.rain-tree.com/reports/carqueja-techreport.pdf>
73. Mesquita Grandi TS, Da Trindade JA, Filardi Pinto MJ, Ferreira LL, Catella AC. Plantas medicinais de Minas Gerais, Brasil. *Acta Bot Brasilica* [Internet]. 1989;3(2):185–224. Available from: [http://www.scielo.br/scielo.php?script=sci\\_arttext&pid=S0102-33061989000300018&lng=pt&nrm=iso&tlng=pt](http://www.scielo.br/scielo.php?script=sci_arttext&pid=S0102-33061989000300018&lng=pt&nrm=iso&tlng=pt)
74. Martino VS. Problemática sanitaria y social de la enfermedad de Chagas. Aporte de la medicina tradicional argentina. Sanitary and social problematic of Chagas disease. Contribution of Argentine Traditional Medicine. *Dominguezia*. 2012;28(2):29–37.
75. Alonso JR. El lapacho. *Rev Fitoter*. 2000;1(2):107–17.
76. Bourdy G, Chavez De Michel LR, Roca-Coulthard A. Pharmacopoeia in a shamanistic society: The Izoceño-Guaraní (Bolivian Chaco). *J Ethnopharmacol*. 2004;91(2–3):189–208.
77. Sülsen VP, Cazorla SI, Frank FM, Redko FC, Anesini CA, Coussio JD, et al. Trypanocidal and

- Leishmanicidal Activities of Flavonoids from Argentine Medicinal Plants. *Am J Trop Med Hyg.* 2007;77(4):654–9.
78. Menna-Barreto RFS, Laranja GAT, Silva MCC, Coelho MGP, Paes MC, Oliveira MM, et al. Anti-Trypanosoma cruzi activity of Pterodon pubescens seed oil: Geranylgeraniol as the major bioactive component. *Parasitol Res.* 2008;103(1):111–7.
  79. Sepúlveda-Robles O, Espinoza-Gutiérrez B, Gomez-Verjan JC, Guzmán-Gutiérrez SL, De Ita M, Silva-Miranda M, et al. Trypanocidal and toxicological assessment in vitro and in silico of three sesquiterpene lactones from Asteraceae plant species. *Food Chem Toxicol [Internet].* 2019;125(December 2018):55–61. Available from: <https://doi.org/10.1016/j.fct.2018.12.023>
  80. Schmidt TJ, Nour AMM, Khalid SA, Kaiser M, Brun R. Quantitative structure - Antiprotozoal activity relationships of sesquiterpene lactones. *Molecules.* 2009;14(6):2062–76.
  81. Salas CO, Faundez M, Morello A, Maya JD, Tapia RA. Natural and Synthetic Naphthoquinones Active Against Trypanosoma Cruzi: An Initial Step Towards New Drugs for Chagas Disease. *Curr Med Chem.* 2011;18:144–61.
  82. Ventura Pinto A, Lisboa de Castro S. The Trypanocidal Activity of Naphthoquinones: A Review. *Molecules.* 2009;14(11):4570–90.
  83. Sales PA, Molina I, Murta SMF, Sánchez-Montalvá A, Salvador F, Corrêa-Oliveira R, et al. Experimental and clinical treatment of Chagas disease: A review. *Am J Trop Med Hyg.* 2017;97(5):1289–303.
  84. Muschietti L V., Ulloa JL. Natural sesquiterpene lactones as potential trypanocidal therapeutic agents: A review. *Nat Prod Commun.* 2016;11(10):1569–78.
  85. Kimani NM, Matasyoh JC, Kaiser M, Nogueira MS, Trossini GHG, Schmidt TJ. Complementary quantitative structure–activity relationship models for the antitrypanosomal activity of sesquiterpene lactones. *Int J Mol Sci.* 2018;19(12).
  86. Moraes Neto RN, Setúbal RFB, Higino TMM, Brelaz-de-Castro MCA, da Silva LCN, Aliança AS dos S. Asteraceae Plants as Sources of Compounds Against Leishmaniasis and Chagas Disease. *Front Pharmacol.* 2019;10(May):1–20.
  87. Zimmermann S, Fouché G, De Mieri M, Yoshimoto Y, Usuki T, Nthambeleni R, et al. Structure-Activity relationship study of sesquiterpene lactones and their semi-synthetic amino derivatives as potential antitrypanosomal products. *Molecules.* 2014;19(3):3523–38.
  88. Orellana CA, Marcellin E, Schulz BL, Nouwens AS, Gray PP, Nielsen LK. High-antibody-producing chinese hamster ovary cells up-regulate intracellular protein transport and glutathione synthesis. *J Proteome Res.* 2015;14(2):609–18.
  89. Malik EM, Müller CE. Anthraquinones As Pharmacological Tools and Drugs. *Med Res Rev.* 2016;36(4):705–48.
  90. Campos-Martin JM, Blanco-Brieva G, Fierro JLG. Hydrogen peroxide synthesis: An outlook beyond the anthraquinone process. *Angew Chemie - Int Ed.* 2006;45(42):6962–84.
  91. Okumura N, Mizutani H, Ishihama T, Ito M, Hashibe A, Nakayama T, et al. Study on Redox Properties and Cytotoxicity of Anthraquinone Derivatives to Understand Antitumor Active Anthracycline Substances. *Chem Pharm Bull (Tokyo).* 2019;67(7):717–20.
  92. Pedrosa RC, de Bem AF, Locatelli C, Geremias R, Filho DW. Time-dependent oxidative stress caused by benzimidazole. *Redox Rep.* 2004;6(4):265–70.
  93. Li Y, Jiang JG. Health functions and structure-activity relationships of natural anthraquinones

- from plants. *Food Funct.* 2018;9(12):6063–80.
94. De Lima AR, Noris-Suárez K, Bretaña A, Contreras VT, Navarro MC, Pérez-Ybarra L, et al. Growth arrest and morphological changes triggered by emodin on *Trypanosoma cruzi* epimastigotes cultivated in axenic medium. *Biochimie.* 2017;142:31–40.
  95. Justiniano I, Noris-Suarez K, De Lima AR, Contreras VT, Bubis J. An unusual casein kinase 1 from *Trypanosoma cruzi* epimastigotes. *Biochem Compd.* 2014;2(1):1.
  96. De Castro S, Pinto M, Pinto A. Screening of natural and synthetic drugs against *Trypanosoma cruzi*. 1. Establishing a structure/activity relationship. *Microbios.* 1994;78(315):83–90.
  97. Hattori M, Namba T, Akao T, Kobashi K. Metabolism of sennosides by human intestinal bacteria. *Pharmacology.* 1988;36(Suppl 1):172–9.
  98. Nicolas P, Tod M, Padoin C, Petitjean O. Clinical Pharmacokinetics of Diacerein. *Clin Pharmacokinet.* 1998;35(5):347–59.

**Table 1.** Socio-demographic characteristics of the informants in the surveyed rural areas reporting knowledge about CD medicinal plants\*, number of use reports and reported taxa.

| Ethnicity  | Geographical zone    | Total      | Gender |    | Age class |          |      | Use reports | Reported taxa |
|------------|----------------------|------------|--------|----|-----------|----------|------|-------------|---------------|
|            |                      | Informants | F      | M  | < 40      | 41 to 60 | > 60 |             |               |
| Ayoreo     | Chiquitania          | 5          | 3      | 2  | 1         | 4        | 0    | 5           | 3             |
| Chiquitano | Chiquitania          | 68         | 33     | 35 | 22        | 24       | 22   | 199         | 38            |
| Guaraní    | Chaco                | 54         | 33     | 21 | 19        | 24       | 11   | 93          | 15            |
| Quechua    | Inter-andean valleys | 19         | 10     | 9  | 8         | 9        | 2    | 42          | 31            |
| Total      |                      | 146        | 79     | 67 | 50        | 61       | 35   | 339         | 87            |

\* responses of women sellers in herbal markets in La Paz and Santa Cruz cities are not included in this table.



**Table 2.** List of plant species reported to be used in the treatment of Chagas disease and related symptoms by Ayoreo, Chiquitano, Guaraní and Quechua informants.

| Family<br>Genus/species                                  | Vernacular name           | Used<br>by | Part<br>used | No. use<br>reports | Application | Origin<br>(status) | Habit   | Acute or<br>chronic<br>phase | Indication<br>Chagas<br>symptom | Voucher<br>specimen |
|----------------------------------------------------------|---------------------------|------------|--------------|--------------------|-------------|--------------------|---------|------------------------------|---------------------------------|---------------------|
| Amaranthaceae                                            |                           |            |              |                    |             |                    |         |                              |                                 |                     |
| <i>Dysphania ambrosioides</i> (L.) Mosyakin & Clemants   | Caré, paico               | C          | L, R         | 17                 | Or          | N (Cul)            | herb    | chro                         | CAR, GAS                        | ASMP33              |
| Anacardiaceae                                            |                           |            |              |                    |             |                    |         |                              |                                 |                     |
| <i>Astronium urundeuva</i> (Allemao) Engl.               | Cuchi                     | C          | B, L         | 2                  | Or          | N (W)              | tree    | chro                         | CAR                             | ASMP56,<br>ASMP6    |
| <i>Schinus molle</i> L.                                  | Molle                     | Q          | L            | 2                  | Or, Tp      | N (W)              | tree    | chro                         | CAR, GAS                        | ASMP90              |
| Annonaceae                                               |                           |            |              |                    |             |                    |         |                              |                                 |                     |
| <i>Annona nutans</i> (R. E. Fr.) R. E. Fr.               | Sinini, Aratiku, Sorimimi | G          | L            | 5                  | Or          | N (W)              | shrub   | chro                         | CAR                             | ASMP11              |
| <i>Duguetia</i> sp.                                      | Sinini                    | C          | L            | 12                 | Or          | n.d. (Cul)         | tree    | chro                         | CAR                             | ASMP41              |
| Apocynaceae                                              |                           |            |              |                    |             |                    |         |                              |                                 |                     |
| <i>Aspidosperma quebracho-blanco</i> Schitdl.            | Cacha                     | C          | B            | 8                  | Or          | N (W)              | tree    | chro                         | CAR, FAT                        | ASMP35              |
| <i>Vallesia glabra</i> (Cav.) Link                       | Amarguillo, Arakuaembu    | G          | L            | 3                  | Or          | N (W)              | tree    | chro                         | CAR                             | ASMP17              |
| Aristolochiaceae                                         |                           |            |              |                    |             |                    |         |                              |                                 |                     |
| <i>Aristolochia andina</i> F. Gonzáles & I. Vargas       | Waje                      | Q          | Br, L        | 1                  | Or          | N (W)              | vine    | chro                         | CAR                             | ASMP94              |
| Asteraceae                                               |                           |            |              |                    |             |                    |         |                              |                                 |                     |
| <i>Acanthostyles buniifolius</i> (Hook. ex Hook. & Arn.) | Romero                    | Q          | AP           | 2                  | Or          | N (Cul)            | shrub   | chro                         | FAT                             | ASMP82              |
| <i>Achyrocline alata</i> (Kunth) DC.                     | Guacanqui, Wira wira      | C, LP      | AP           | 6                  | Or          | N (Cul,Pur)        | herb    | chro                         | CAR                             | ASMP45,<br>ASMP103  |
| <i>Achyrocline hyperchlora</i> S. F. Blake               | Wira wira                 | Q          | AP           | 2                  | Or          | N (W)              | herb    | chro                         | CAR                             | ASMP91              |
| <i>Ambrosia arborescens</i> Mill.                        | Altamisa                  | Q          | L            | 2                  | Or          | N (W)              | subshru | chro                         | CAR                             | ASMP83              |
| <i>Baccharis genistelloides</i> (Lam.) Pers.             | Carqueja, Kinsa k'ucho    | LP, Q      | AP           | 3                  | Or          | N (Pur,W)          | herb    | chro                         | CAR, GAS                        | ASMP28,<br>ASMP85   |
| <i>Bidens andicola</i> Kunth                             | Misuka                    | Q          | AP           | 1                  | Or          | N (W)              | herb    | chro                         | PUR                             | ASMP89              |
| <i>Chromolaena connivens</i> (Rusby) R.M. King & H. Rob. | Sunchuj maman             | Q          | Fr, L        | 1                  | Or          | N (W)              | shrub   | chro                         | FAT                             | ASMP75              |
| <i>Culcitium canescens</i> Humb. & Bonpl.                | K'ia k'ia                 | LP         | AP           | 2                  | Or          | N (Pur)            | herb    | chro                         | CAR                             | ASMP102             |
| <i>Cynara</i> sp.                                        | Alcachofa                 | LP, SC     | AP           | 2                  | Or          | n.d. (Pur)         | herb    | chro                         | CAR                             | ASMP13              |
| <i>Gochnatia boliviana</i> S. F. Blake                   | Melinco                   | Q          | L            | 1                  | Or          | N (W)              | shrub   | chro                         | CAR, FAT                        | ASMP87              |
| <i>Mutisia acuminata</i> Ruiz & Pav.                     | Chinchirkuma              | Q          | Br, L        | 1                  | Or          | N (W)              | shrub   | chro                         | CAR                             | ASMP88              |
| <i>Parthenium hysterophorus</i> L.                       | Artemisa, Chupurujumo     | C          | AP           | 1                  | Or          | N (W)              | herb    | acu, chro                    | FEV, PUR                        | ASMP59              |
| <i>Pluchea sagittalis</i> (Lam.) Cabrera                 | 4 Cantos                  | C          | Fl, L        | 1                  | Or          | N (Cul)            | shrub   | chro                         | CAR                             | ASMP36              |
| <i>Schkuhria pinnata</i> (Lam.) Kunza ex Thell.          | Jayaj pichana             | Q          | AP           | 2                  | Or          | N (W)              | herb    | chro                         | CAR, FAT                        | ASMP76              |
| <i>Sonchus oleraceus</i> L.                              | Diente de Leon            | C, LP      | AP           | 3                  | Or          | I (Pur)            | herb    | chro                         | CAR                             | AMP12,<br>ASMP30    |

|                                                             |                               |          |           |    |    |            |         |           |           |         |
|-------------------------------------------------------------|-------------------------------|----------|-----------|----|----|------------|---------|-----------|-----------|---------|
| <i>Verbesina</i> sp.                                        | Tabaco                        | Q        | L         | 1  | Tp | n.d. (W)   | tree    | acu       | BIT       | ASMP93  |
| Bignoniaceae                                                |                               |          |           |    |    |            |         |           |           |         |
| <i>Handroanthus impetiginosus</i> (Mart. ex DC.) Mattos     | Tajibo, Tajibo negro          | C, G     | B, Fl     | 3  | Or | N (W)      | tree    | chro      | CAR       | ASMP18, |
| <i>Jacaranda cuspidifolia</i> Mart.                         | Paraparau                     | C        | B         | 6  | Or | N (W)      | tree    | chro      | CAR, FAT  | ASMP34  |
| <i>Tabebuia aurea</i> (Silva Manso) Benth. & Hook. F. ex S. | Paratodo, Alcornoque          | C, A     | B         | 30 | Or | N (Cul)    | tree    | chro      | CAR, FAT, | ASMP9   |
| Bixaceae                                                    |                               |          |           |    |    |            |         |           |           |         |
| <i>Bixa orellana</i> L.                                     | Urugu                         | C, G     | L         | 4  | Or | N (W)      | tree    | chro      | CAR       | ASMP26  |
| Caricaceae                                                  |                               |          |           |    |    |            |         |           |           |         |
| <i>Carica papaya</i> L.                                     | Papaya                        | C, G     | Fl        | 3  | Or | I (Cul)    | tree    | chro      | CAR, GAS  | ASMP38  |
| Cochlospermaceae                                            |                               |          |           |    |    |            |         |           |           |         |
| <i>Cochlospermum tetraporum</i> Hallier f.                  | Kuari, Pela pela              | G        | B, L      | 8  | Or | N (Cul)    | tree    | chro      | CAR       | ASMP22  |
| Cucurbitaceae                                               |                               |          |           |    |    |            |         |           |           |         |
| <i>Momordica charantia</i> L.                               | Balsamina                     | C        | AP        | 3  | Or | I (Cul)    | vine    | chro      | CAR       | ASMP58  |
| Ephedraceae                                                 |                               |          |           |    |    |            |         |           |           |         |
| <i>Ephedra americana</i> Humb. & Bonpl. Ex Willd.           | Pisqo simi                    | Q        | AP        | 1  | Or | N (W)      | shrub   | chro      | FAT       | ASMP96  |
| Euphorbiaceae                                               |                               |          |           |    |    |            |         |           |           |         |
| <i>Croton andinus</i> Muell. Arg.                           | Taporita, Tupeicha            | G        | R         | 5  | Or | N (W)      | herb    | chro      | CAR       | ASMP21  |
| <i>Croton</i> sp.                                           | K'uru k'uru                   | Q        | La        | 1  | Tp | n.d. (W)   | herb    | acu       | BIT       | ASMP92  |
| <i>Euphorbia serpens</i> Kunth                              | Quebra Pedra                  | C        | Wh        | 4  | Or | N (Cul)    | herb    | chro      | CAR, FAT  | ASMP49  |
| <i>Jatropha curcas</i> L.                                   | Piñón                         | C        | L         | 1  | Or | I (Cul)    | treelet | chro      | FAT       | ASMP39  |
| Fabaceae                                                    |                               |          |           |    |    |            |         |           |           |         |
| <i>Acacia aroma</i> Gillies ex Hook. & Arn.                 | Tusca                         | G        | B, Fl     | 2  | Or | N (Cul)    | tree    | chro      | CAR       | ASMP24  |
| <i>Acacia</i> sp.                                           | Karikari                      | C        | B         | 1  | Or | n.d. (Cul) | tree    | chro      | PUR       | ASMP43  |
| <i>Bauhinia</i> sp.                                         | Patecabra                     | C        | L         | 1  | Or | n.d. (Cul) | shrub   | acu, chro | FEV, PUR  | ASMP42  |
| <i>Copaifera langsdorffii</i> Desf.                         | Copaibo                       | C, SC    | B         | 5  | Or | N (W)      | tree    | chro      | CAR       | ASMP51  |
| <i>Crotalaria incana</i> L.                                 | Amorocita                     | Q        | L         | 1  | Or | N (W)      | herb    | chro      | FAT       | ASMP95  |
| <i>Hymenaea courbaril</i> L.                                | Paquíó                        | C        | B         | 3  | Or | N (W)      | tree    | chro      | CAR, FAT  | ASMP55  |
| <i>Pterodon</i> sp.                                         | Pezoe                         | C        | Se        | 2  | Or | N (W)      | tree    | chro      | FAT       | ASMP52  |
| <i>Senna chloroclada</i> (Harms) H. S. Irwin & Barneby      | Lanza lanza, Mbuijare, Retama | G        | Fl, R,    | 45 | Or | N (W)      | shrub   | acu, chro | CAR, FEV  | ASMP10  |
| <i>Spartium junceum</i> L.                                  | Retama                        | A, SC    | AP        | 3  | Or | I (Pur)    | shrub   | chro      | CAR       | ASMP100 |
| Gesneriaceae                                                |                               |          |           |    |    |            |         |           |           |         |
| <i>Gloxinia gymnostoma</i> Griseb.                          | Ortelón                       | C        | AP        | 2  | Or | N (Cul)    | herb    | chro      | CAR, FAT  | ASMP40  |
| Gramineae                                                   |                               |          |           |    |    |            |         |           |           |         |
| <i>Cymbopogon citratus</i> (DC.) Stapf                      | Paja de cedrón                | C, G, SC | L         | 25 | Or | I (Cul)    | herb    | chro      | CAR, FAT  | ASMP31  |
| Labiatae                                                    |                               |          |           |    |    |            |         |           |           |         |
| <i>Clinopodium axillare</i> (Rusby) Harley                  | Huayra Muña                   | Q        | Br, Fl, L | 2  | Or | N (Cul)    | subshru | chro      | CAR       | ASMP80  |

|                                                    |                         |       |          |    |    |             |          |      |           |         |
|----------------------------------------------------|-------------------------|-------|----------|----|----|-------------|----------|------|-----------|---------|
| <i>Lepechinia vesiculosa</i> (Benth.) Epling       | Raq'acho                | Q     | L        | 1  | Or | N (W)       | shrub    | chro | CAR       | ASMP81  |
| <i>Minthostachys ovata</i> (Briq.) Epl.            | Muña                    | Q     | AP       | 3  | Or | N (Cul)     | subshrub | chro | FAT, GAS  | ASMP69  |
| <i>Ocimum americanum</i> L.                        | Albahaca                | C     | Wh       | 2  | Or | I (Cul)     | herb     | chro | CAR       | ASMP48  |
| <i>Aloe vera</i> (L.) Burm.f.                      | Sábila, karaguata guasu | C, G  | La       | 5  | Tp | I (Cul)     | herb     | acu  | BIT, PUR  | ASMP25  |
| Linaceae                                           |                         |       |          |    |    |             |          |      |           |         |
| <i>Linum usitatissimum</i> L.                      | Linaza                  | Q     | Fr       | 2  | Or | I (Cul)     | herb     | chro | PUR       | ASMP71  |
| Malpigiaceae                                       |                         |       |          |    |    |             |          |      |           |         |
| <i>Galphimia brasiliensis</i> (L.) A. Juss.        | Masiaré                 | A, C  | R        | 11 | Or | N (Cul)     | herb     | chro | CAR, FAT  | ASMP32  |
| sterile                                            | Azucaró                 | C     | B        | 4  | Or | n.d. (W)    | tree     | chro | CAR       | ASMP54  |
| Malvaceae                                          |                         |       |          |    |    |             |          |      |           |         |
| <i>Malva parviflora</i> L.                         | Malva                   | LP, Q | AP       | 2  | Or | I (Cul,Pur) | herb     | chro | CAR, FAT, | ASMP77, |
| Meliaceae                                          |                         |       |          |    |    |             |          |      |           |         |
| <i>Trichilia</i> sp.                               | Tipa                    | C, SC | B        | 11 | Or | n.d. (Cul)  | tree     | chro | CAR       | ASMP53  |
| Myrtaceae                                          |                         |       |          |    |    |             |          |      |           |         |
| <i>Myrcianthes callicoma</i> McVaugh               | Guapurú                 | Q     | L        | 1  | Tp | N (W)       | tree     | chro | FAT       | ASMP73  |
| <i>Myrcianthes pseudomato</i> (D. Legrand) McVaugh | K'arasacha              | Q     | L        | 2  | Or | N (W)       | tree     | chro | CAR, GAS  | ASMP72  |
| <i>Plinia cauliflora</i> (Mart.) Kausel            | Guapurú                 | C     | L        | 1  | Or | N (Cul)     | tree     | chro | CAR       | ASMP60  |
| Oxalidaceae                                        |                         |       |          |    |    |             |          |      |           |         |
| <i>Hypseocharis pimpinellifolia</i> Remy           | Sultaki                 | Q     | R        | 1  | Tp | N (W)       | herb     | chro | FAT       | ASMP70  |
| Papaveraceae                                       |                         |       |          |    |    |             |          |      |           |         |
| <i>Argemone subfusiformis</i> G. B. Ownbey         | Cardo Santo             | C, G  | Fl       | 3  |    | N (W)       | herb     | chro | CAR       | ASMP20  |
| <i>Bocconia integrifolia</i> Bonpl.                | Turumi                  | Q     | L        | 1  | Or | N (W)       | tree     | chro | FAT       | ASMP97  |
| Passifloraceae                                     |                         |       |          |    |    |             |          |      |           |         |
| <i>Passiflora cincinnata</i> Mast.                 | Pachío, Mburukuya       | C, G  | Fl, L, R | 13 | Or | N (W)       | vine     | chro | CAR, FAT  | ASMP16  |
| Piperaceae                                         |                         |       |          |    |    |             |          |      |           |         |
| <i>Piper rusbyi</i> C. DC.                         | Matico                  | C     | L        | 7  | Or | N (Cul,W)   | shrub    | chro | FAT, PUR  | ASMP50, |
| Plantaginaceae                                     |                         |       |          |    |    |             |          |      |           |         |
| <i>Plantago major</i> L.                           | Llantén                 | C     | Fl, L    | 3  | Or | I (Cul)     | herb     | chro | CAR       | ASMP47  |
| Polygalaceae                                       |                         |       |          |    |    |             |          |      |           |         |
| <i>Monnina wrightii</i> A. Gray                    | T'ian t'ian             | Q     | L        | 1  | Or | N (W)       | herb     | chro | CAR       | ASMP84  |
| Rosaceae                                           |                         |       |          |    |    |             |          |      |           |         |
| <i>Rubus</i> sp.                                   | Kari kari               | LP    | AP       | 2  | Or | n.d. (Pur)  | herb     | chro | CAR       | ASMP101 |
| Rutaceae                                           |                         |       |          |    |    |             |          |      |           |         |
| <i>Heterophyllaea lycioides</i> (Rusby) Sandwith   | Kapi                    | Q     | L        | 1  | Or | N (W)       | shrub    | chro | GAS       | ASMP86  |
| <i>Ruta chalepensis</i> L.                         | Ruda                    | Q     | L        | 1  | Or | I (Cul)     | herb     | chro | GAS, PUR  | ASMP99  |
| <i>Zanthoxylum coco</i> Gillies ex Hook. F. & Arn. | Chirimolle              | Q     | L        | 1  | Or | N (W)       | tree     | chro | CAR       | ASMP74  |
| Solanaceae                                         |                         |       |          |    |    |             |          |      |           |         |
| <i>Cestrum parqui</i> L'Her.                       | Andrés Huaylla          | LP, Q | AP, L    | 2  | Or | N (Cul,Pur) | shrub    | chro | CAR, GAS  | ASMP78, |

|                                                         |                           |          |      |    |    |         |         |      |     |        |
|---------------------------------------------------------|---------------------------|----------|------|----|----|---------|---------|------|-----|--------|
| <i>Solanum palinacanthum</i> Dunal                      | Pica Pica                 | C        | L, R | 1  | Or | N (Cul) | subshru | chro | PUR | ASMP44 |
| Urticaceae                                              |                           |          |      |    |    |         |         |      |     |        |
| <i>Urtica urens</i> L.                                  | Ortiga                    | LP       | AP   | 1  | Or | I (Pur) | herb    | chro | CAR | ASMP29 |
| Valerianaceae                                           |                           |          |      |    |    |         |         |      |     |        |
| <i>Valeriana potopensis</i> Briq.                       | Jama jama                 | Q        | B, L | 1  | Or | N (W)   | herb    | chro | CAR | ASMP98 |
| Verbenaceae                                             |                           |          |      |    |    |         |         |      |     |        |
| <i>Aloysia citriodora</i> Palau                         | Cedrón                    | C, Q     | L    | 4  | Or | N (Cul) | shrub   | chro | CAR | ASMP79 |
| <i>Aloysia polystachya</i> (Griseb.) Moldenke           | Poleo                     | C        | AP   | 2  | Or | N (Cul) | shrub   | chro | CAR | ASMP37 |
| Zingiberaceae                                           |                           |          |      |    |    |         |         |      |     |        |
| <i>Alpinia zerumbet</i> (Pers.) B. L. Burtt & R. M. Sm. | Colonia                   | C, G, SC | Fl   | 26 | Or | I (Cul) | herb    | chro | CAR | ASMP19 |
| Zygophyllaceae                                          |                           |          |      |    |    |         |         |      |     |        |
| <i>Bulnesia bonariensis</i> Griseb                      | Guayacán, Guayacán Morado | C, G     | B    | 3  | Or | N (Cul) | tree    | chro | CAR | ASMP23 |

Abbreviations: A:Ayoreo; C:Chiquitano; G:Guaraní; LP:La Paz; SC:Santa Cruz; AP:aerial parts; B:bark; Br:branches; Fl:flowers; Fr:fruit; La:latex; L:leaves; R:roots; Se:seeds; Wh:whole plant; Or:oral application; Tp:topical application; N:native; I: introduced; n.d.: not determined; Cul:cultivated; Pur:purchased at market; W:wild; chro:chronic; acu:acute; BIT:Vinchuca bite; CAR:cardiovascular symptoms; FEV:fever; GAS:gastrodigestive symptoms; FAT:fatigue; PUR:purifier/blood purifier/to strenghten the blood

**Table 3.** *In vitro* antiproliferative activity of compounds isolated from plant extracts on *T. cruzi* epimastigote-stage (72 h) and trypomastigotes release (6 dpi). Cytotoxic (antiproliferative) effects of the compounds were assessed on CHO host cells after 72 h. CHO cells cultured in medium without FBS showed a reduced cytotoxicity towards sesquiterpene lactones than proliferating CHO cells. Data shown are mean values  $\pm$  SD of at least three independent experiments each performed in triplicates.

| Isolated cpd            | IC <sub>50</sub> epimastigotes<br>[ $\mu$ M] | % inhibition of parasite<br>release<br>at 5 $\mu$ M | IC <sub>50</sub> CHO cells<br>[ $\mu$ M] | IC <sub>50</sub> CHO cells<br>without FBS<br>[ $\mu$ M] |
|-------------------------|----------------------------------------------|-----------------------------------------------------|------------------------------------------|---------------------------------------------------------|
| Nepodin *               | 28.7 $\pm$ 13.3                              | 34.7 $\pm$ 30.9                                     | >100                                     | n.d                                                     |
| Torachryson *           | >50                                          | 25.9 $\pm$ 15.5                                     | >100                                     | n.d                                                     |
| Emodin *                | 14.1 $\pm$ 8.2                               | 61.5 $\pm$ 18.2                                     | >100                                     | n.d                                                     |
| Falcarindiol †          | >50                                          | 0                                                   | >100                                     | n.d                                                     |
| Costunolide ‡           | 7.4 $\pm$ 5.9                                | 0                                                   | 10.9 $\pm$ 3.7                           | 35.4 $\pm$ 13.8                                         |
| Reynosin #              | >50                                          | 50.0 $\pm$ 47.1                                     | 31.3 $\pm$ 8.0                           | 66.1 $\pm$ 1.2                                          |
| Santamarine #           | 19.5 $\pm$ 9.3                               | 55.9 $\pm$ 46.7                                     | 13.2 $\pm$ 4.3                           | 39.4 $\pm$ 1.5                                          |
| Zaluzanin C #           | 6.7 $\pm$ 0.7                                | 71.0 $\pm$ 7.5                                      | 6.6 $\pm$ 1.7                            | 19.2 $\pm$ 5.2                                          |
| 3-acetylzaluzanin C #   | 6.3 $\pm$ 0.9                                | 83.0 $\pm$ 10.1                                     | 6.9 $\pm$ 2.4                            | n.d                                                     |
| Dehydrocostus lactone # | 1.4 $\pm$ 0.4                                | 86.2 $\pm$ 4.1                                      | 5.8 $\pm$ 1.9                            | 12.2 $\pm$ 0.5                                          |
| Eremanthin #            | 1.9 $\pm$ 0.3                                | 87.6 $\pm$ 9.9                                      | 7.3 $\pm$ 1.4                            | 11.5 $\pm$ 0.2                                          |
| Bzn (20 $\mu$ M)        | 13.8 $\pm$ 2.9                               | 76.9 $\pm$ 15.2                                     | >100                                     | n.d                                                     |

\* *Rumex crispus* root, † *Sium sisarum* root, ‡ *Rheum rhaponticum* root, # *Laurus nobilis* leaf

**Table 4.** Chemical structures of natural and synthetic anthraquinones tested on *T. cruzi*.

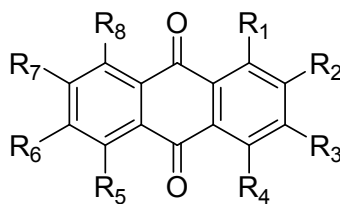

| ID |                                 | R1              | R2                | R3                  | R4                  | R5                  | R6              | R7 | R8                |
|----|---------------------------------|-----------------|-------------------|---------------------|---------------------|---------------------|-----------------|----|-------------------|
| 1  | Anthraquinone                   | H               | H                 | H                   | H                   | H                   | H               | H  | H                 |
| 2  | Emodin                          | OH              | H                 | OH                  | H                   | H                   | CH <sub>3</sub> | H  | OH                |
| 3  | Purpurin                        | OH              | OH                | H                   | OH                  | H                   | H               | H  | H                 |
| 4  | Alizarin                        | OH              | OH                | H                   | H                   | H                   | H               | H  | H                 |
| 5  | Alizarin RedS                   | OH              | OH                | SO <sub>2</sub> ONa | H                   | H                   | H               | H  | H                 |
| 6  | Quinizarin                      | OH              | H                 | H                   | OH                  | H                   | H               | H  | H                 |
| 7  | Anthrarufin                     | OH              | H                 | H                   | H                   | OH                  | H               | H  | H                 |
| 8  | Dantron                         | OH              | H                 | H                   | H                   | H                   | H               | H  | OH                |
| 9  | Anthraflavic acid               | H               | OH                | H                   | H                   | H                   | OH              | H  | H                 |
| 10 | Chrysophanol                    | OH              | H                 | CH <sub>3</sub>     | H                   | H                   | H               | H  | OH                |
| 11 | Aloe-emodin                     | OH              | H                 | CH <sub>2</sub> OH  | H                   | H                   | H               | H  | OH                |
| 12 | Physcion                        | OH              | H                 | CH <sub>3</sub> O   | H                   | H                   | CH <sub>3</sub> | H  | OH                |
| 13 | 2-Hydroxy-3-methylanthraquinone | H               | OH                | CH <sub>3</sub>     | H                   | H                   | H               | H  | H                 |
| 14 | 2-Hydroxy-1-methylanthraquinone | CH <sub>3</sub> | OH                | H                   | H                   | H                   | H               | H  | H                 |
| 15 | Rhein                           | H               | COOH              | H                   | OH                  | OH                  | H               | H  | H                 |
| 16 | Diacerein                       | H               | COOH              | H                   | CH <sub>3</sub> COO | CH <sub>3</sub> COO | H               | H  | H                 |
| 17 | Disperse Red11                  | NH <sub>2</sub> | CH <sub>3</sub> O | H                   | NH <sub>2</sub>     | H                   | H               | H  | H                 |
| 18 | Aurantio obtusin                | OH              | CH <sub>3</sub> O | OH                  | H                   | H                   | CH <sub>3</sub> | OH | CH <sub>3</sub> O |



**Table 5.** *In vitro* antiproliferative activity of anthraquinones on *T. cruzi* epimastigotes (72 h) and trypomastigotes release (6 dpi). Compounds that inhibited at least 20% of parasite release in the trypomastigote infection assay at 0.5  $\mu$ M were tested for antiproliferative effects on CHO host cells. Data shown are mean values  $\pm$  SD of at least three independent experiments each performed in triplicates.

| ID           | IC <sub>50</sub> epimastigotes<br>[ $\mu$ M] | % inhibition of parasite<br>release<br>at 0.5 $\mu$ M | IC <sub>50</sub> CHO cells<br>[ $\mu$ M] |
|--------------|----------------------------------------------|-------------------------------------------------------|------------------------------------------|
| 1            | >50                                          | 17.8 $\pm$ 11.8                                       | n.d.                                     |
| 2            | <b>14.1 <math>\pm</math> 8.1</b>             | <b>53.2 <math>\pm</math> 24.3</b>                     | <b>&gt;100</b>                           |
| 3            | >50                                          | 52.5 $\pm$ 14.4                                       | 59.5 $\pm$ 10.1                          |
| 4            | >50                                          | 0                                                     | n.d.                                     |
| 5            | >50                                          | 0                                                     | n.d.                                     |
| 6            | >50                                          | 33.4 $\pm$ 20.1                                       | 38.1 $\pm$ 16.0                          |
| 7            | >50                                          | 0                                                     | n.d.                                     |
| 8            | 5.3 $\pm$ 2.3                                | 0                                                     | n.d.                                     |
| 9            | >50                                          | 22.4 $\pm$ 14.7                                       | 77.8 $\pm$ 1.7                           |
| 10           | 6.6 $\pm$ 3.5                                | 0                                                     | n.d.                                     |
| 11           | 14.5 $\pm$ 5.6                               | 26.6 $\pm$ 21.9                                       | 42.0 $\pm$ 15.5                          |
| 12           | 6.4 $\pm$ 3.7                                | 18.1 $\pm$ 16.7                                       | n.d.                                     |
| 13           | >50                                          | 0                                                     | n.d.                                     |
| 14           | >50                                          | 30.5 $\pm$ 7.9                                        | 88.9 $\pm$ 8.9                           |
| 15           | >50                                          | 0                                                     | n.d.                                     |
| 16           | >50                                          | 0                                                     | n.d.                                     |
| 17           | 32.9 $\pm$ 13.9                              | 0                                                     | n.d.                                     |
| 18           | >50                                          | 0                                                     | n.d.                                     |
| Benznidazole | 13.8 $\pm$ 2.9                               | 0                                                     | >100                                     |

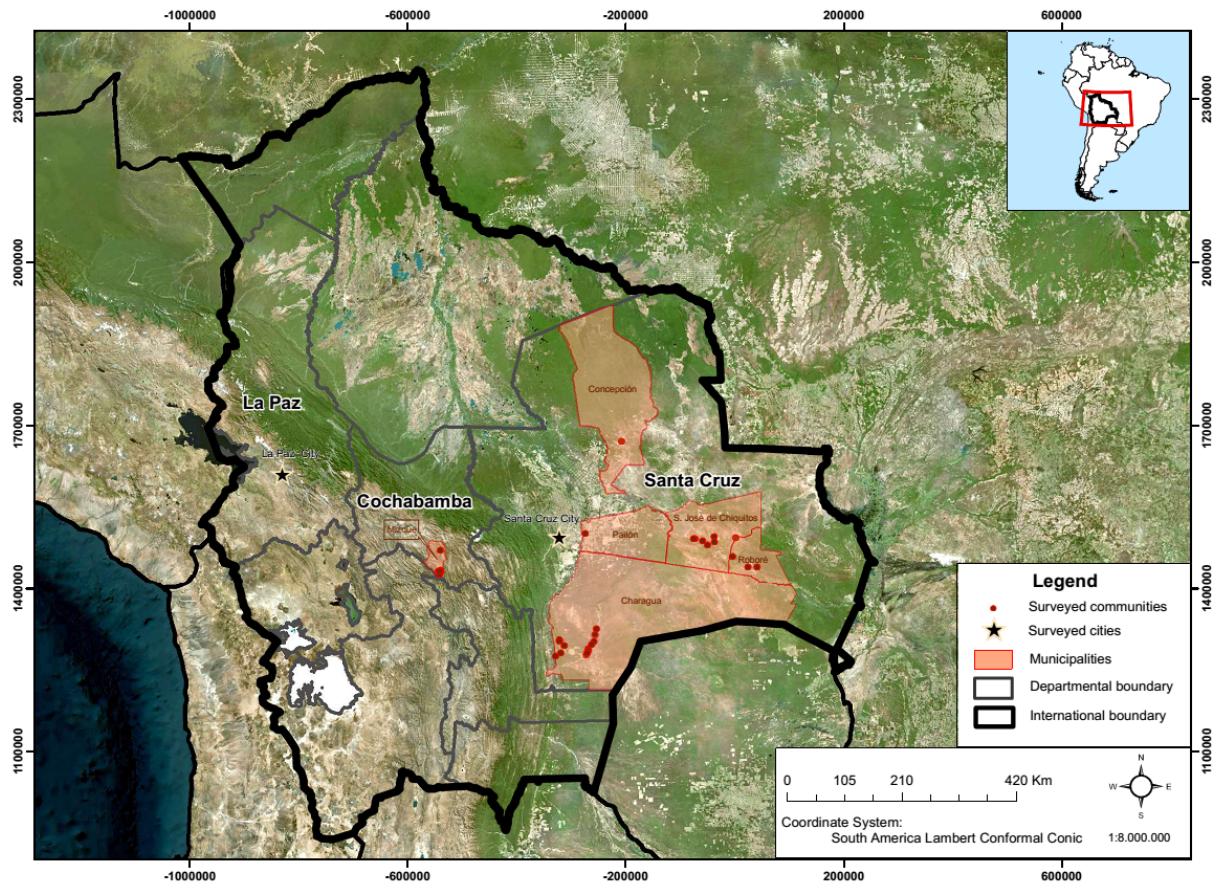

**Figure 1.** Areas of the ethnopharmacological field study in Bolivia. The three different municipalities (orange), surveyed communities (red dots) and cities (stars) are shown. The map was generated using the GPS coordinates with ArcGIS, version 10.3.

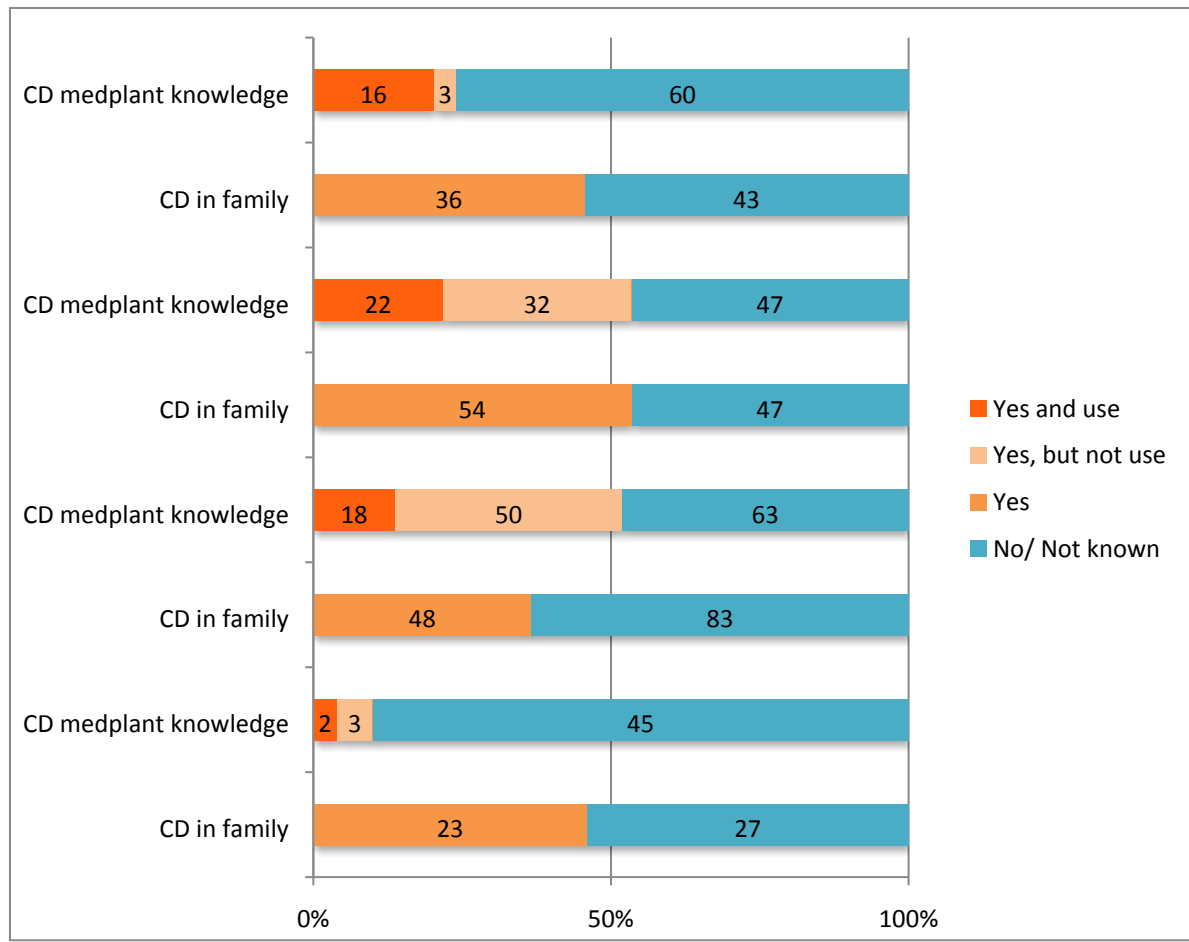

**Figure 2.** Graphical summary of the ethnomedical data. The number of informants from the four ethnic groups reporting knowledge and use of CD medicinal plants/agents (CD medplant knowledge), and the corresponding stated occurrence of CD in the family (CD in family) are shown.

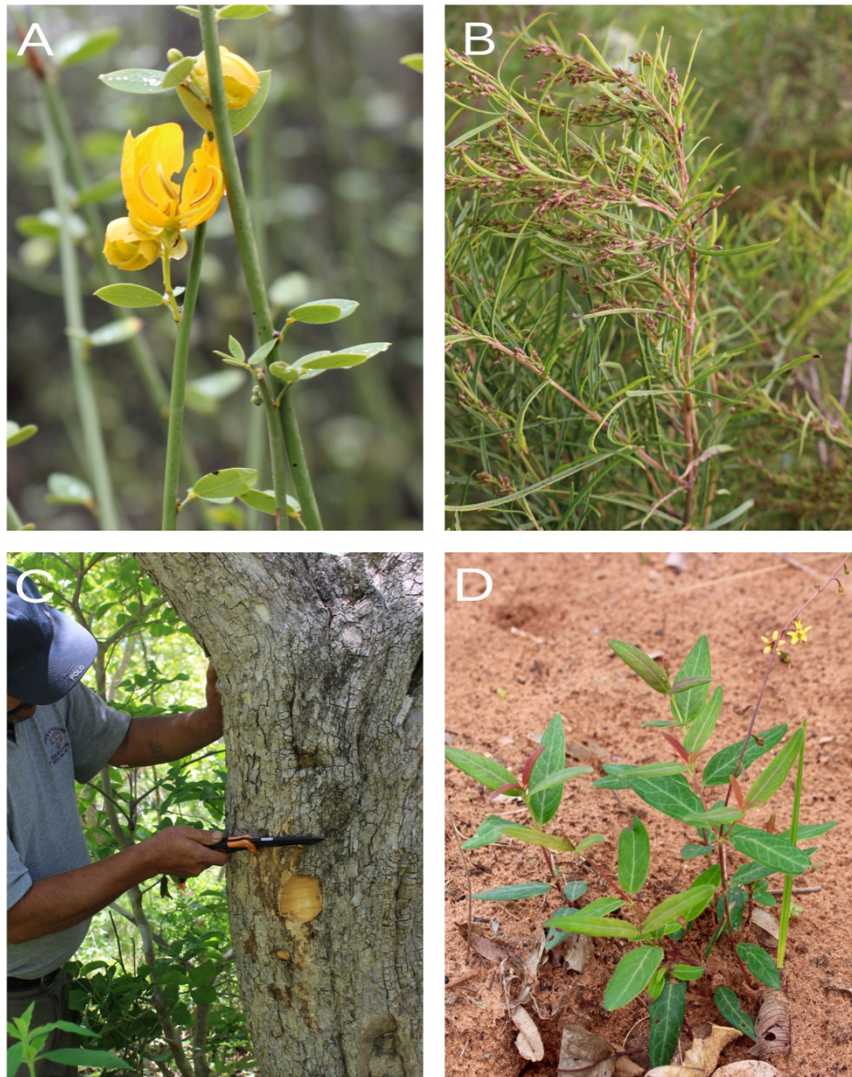

**Figure 3.** Selected Bolivian plant species used to treat symptoms related to CD. (A) *Senna chloroclada* flowers and roots were the most frequently cited botanical drugs among the Izoceño-Guaraní showing significant selective antichagasic effects on cellular parasite release *in vitro*. (B) *Acanthostyles buniifolius* was used by the Quechua and exhibited selective antichagasic activity *in vitro*. (C) Chiquitano informant cutting tree bark of *Jacaranda cuspidifolia* (D) The roots of *Galphimia brasiliensis* are used by the Chiquitano to treat symptoms related to CD.



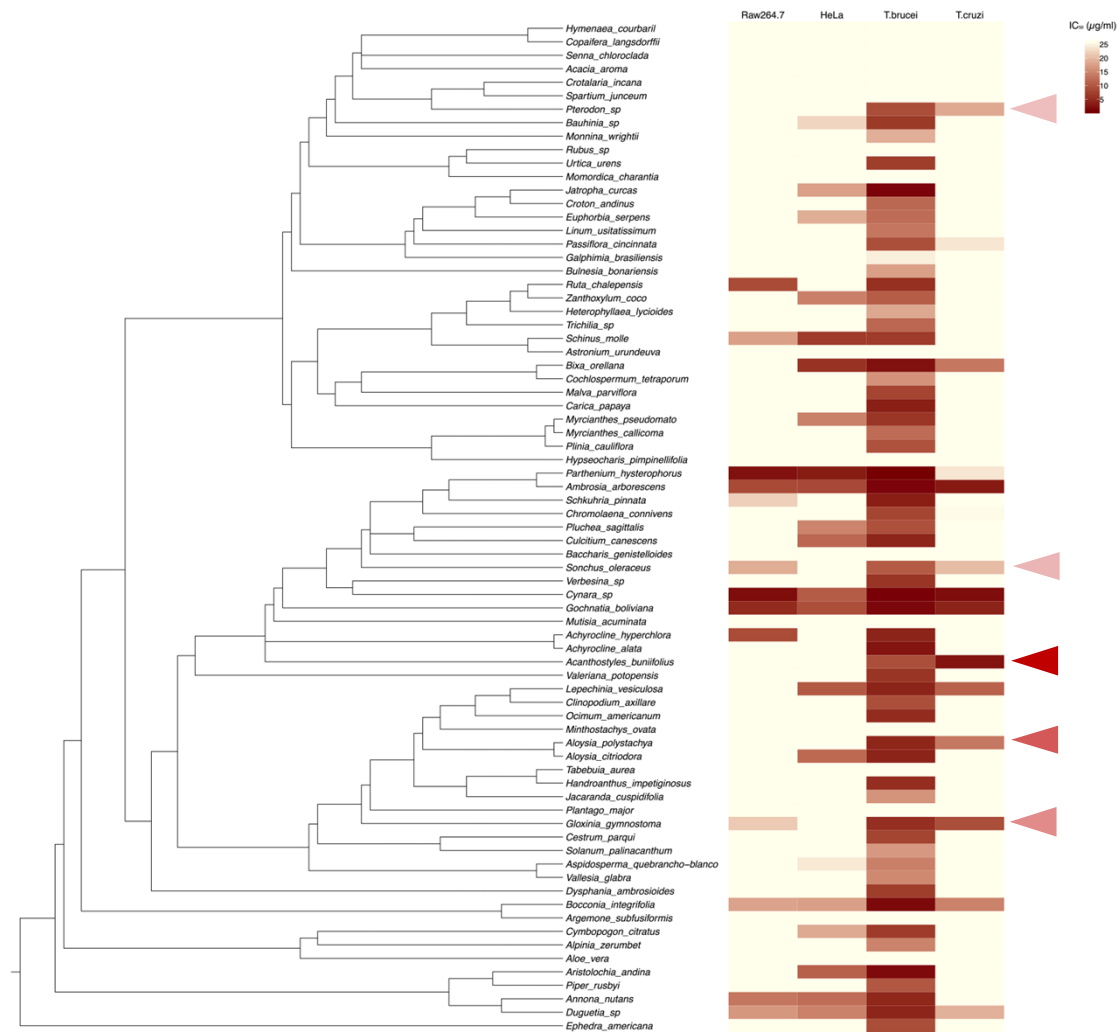

**Figure 4.** Phylobioactivity profiling of the EtOAc extract library generated from Bolivian medicinal plants used to treat symptoms of CD (reported plant part used). Few extracts showed selective toxicity towards *T. cruzi* epimastigotes with IC<sub>50</sub> values below 20 µg/mL (arrows). There was a high of extracts toxic for procyclic *T. brucei*, and many showed antiproliferative effects in HeLa and Raw264.7 cells. The Leguminosae was the only subfamily cluster (top) showing no bioactivities up to 25 µg/mL. In the sesquiterpene lactone rich family Asteraceae, only *Acanthostyles buniifolius* showed selective antitrypanosomal effects. Data represent profiling values from at least two independent screening assays each performed in triplicates.

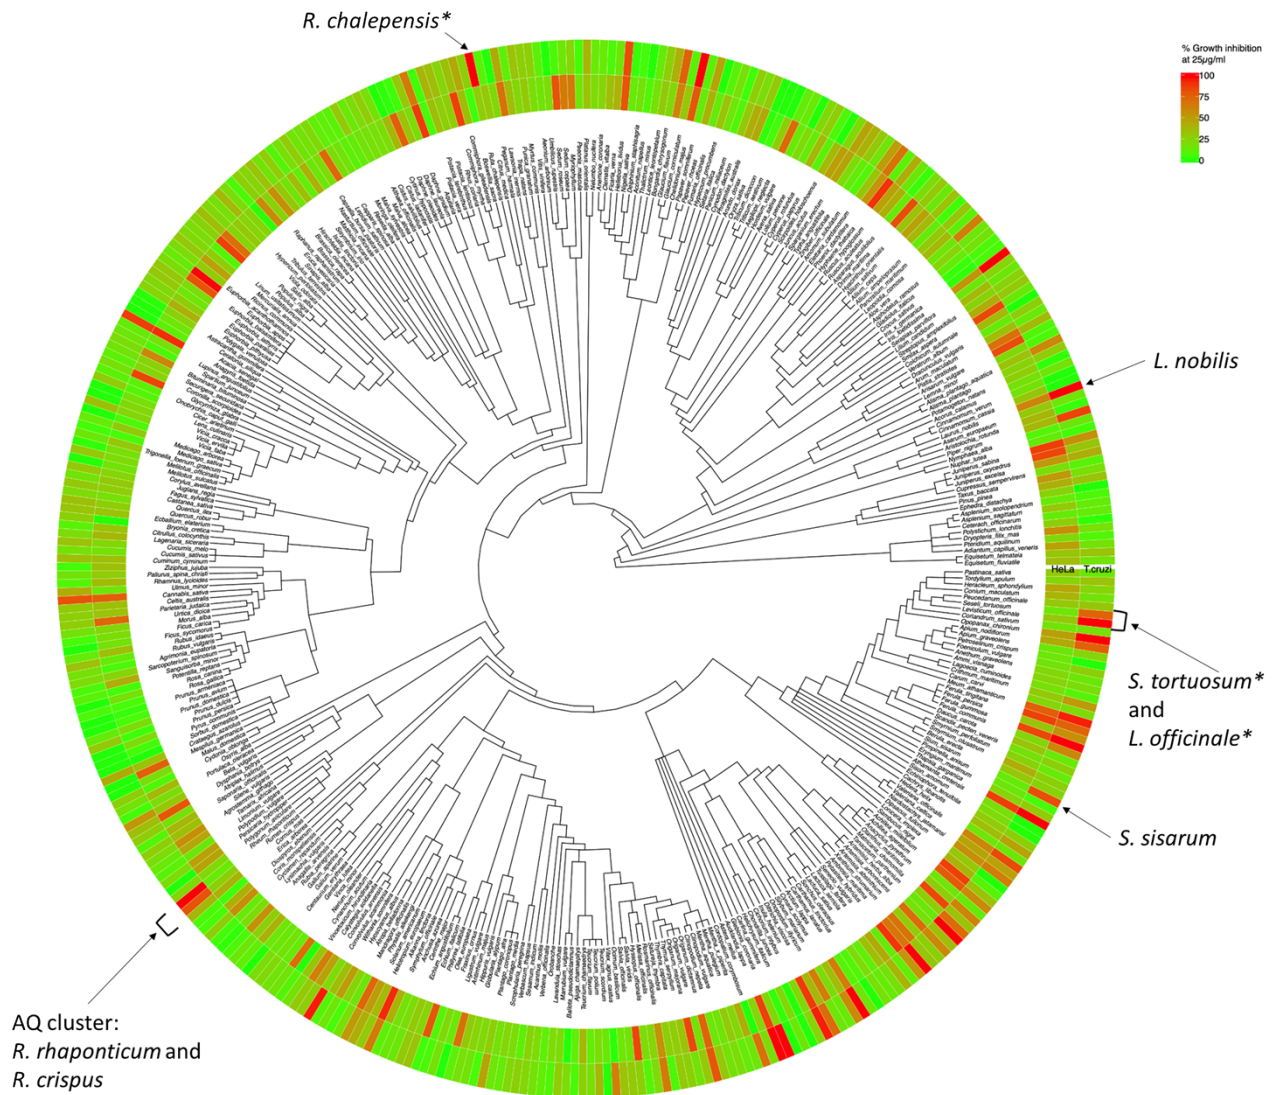

**Figure 6.** Phylobioactivity tree displaying phylogenetic relationships associated with bioactivities. The outer ring shows growth inhibition on *T. cruzi* epimastigotes, and the inner ring shows growth inhibition of HeLa cells (both at 25 µg/mL; most active plant part shown only). A hypothetical coumarin cluster (\*) (*Ruta chalepensis* root, *Levisticum officinale* seeds and *Seseli tortuosum* root) and the anthraquinone cluster (*Rhumex crispus* and *Rheum rhaponticum* rhizoma) are visible. *Laurus nobilis* root and fruits and *Sium sisarum* root (microfractionated) are indicated in the phylogenetic tree. Detailed data on plant species and activities are shown in supplementary Table 2S.



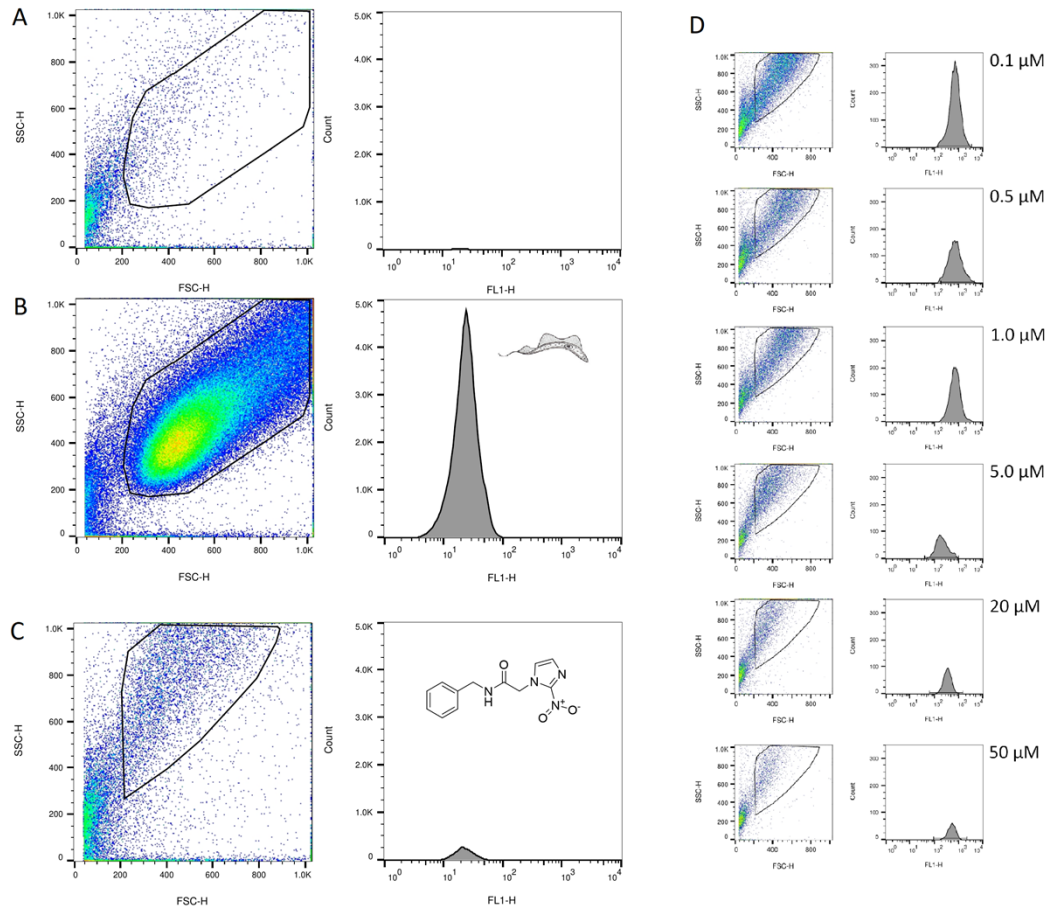

**Figure 5.** FACS-based trypanostigote infection assay in CHO cells. CHO cells were infected with trypanostigotes (10:1) for 24 h, washed, and incubated in low FBS (1%) medium for 6 days. Extracts dissolved in DMSO, vehicle and positive controls were added after washing and left for 6 days. Parasites released into the media at 6dpi were stained with SYTO™ green fluorescent nucleic acid stain, fixed with 4% paraformaldehyde and collected for FACS analysis. (A) Negative control of non-infected cells at 6 dpi showing FSC/SSC and FL1 histograms. (B) Positive control showing fluorescence associated to parasites at 6 dpi showing FSC/SSC and FL1 histograms. (C) Representative example of benznidazole (Bnz) treatment (20 μM) at 6 dpi showing FSC/SSC and FL1 histograms illustrative of reduced parasite release. (D) Illustration of concentration-dependent effect by Benznidazol (Bnz) leading to decrease of parasites in medium at 6 dpi with a calculated IC<sub>50</sub> value of 2 ± 0.4 μM (maximal efficacy about 75%).

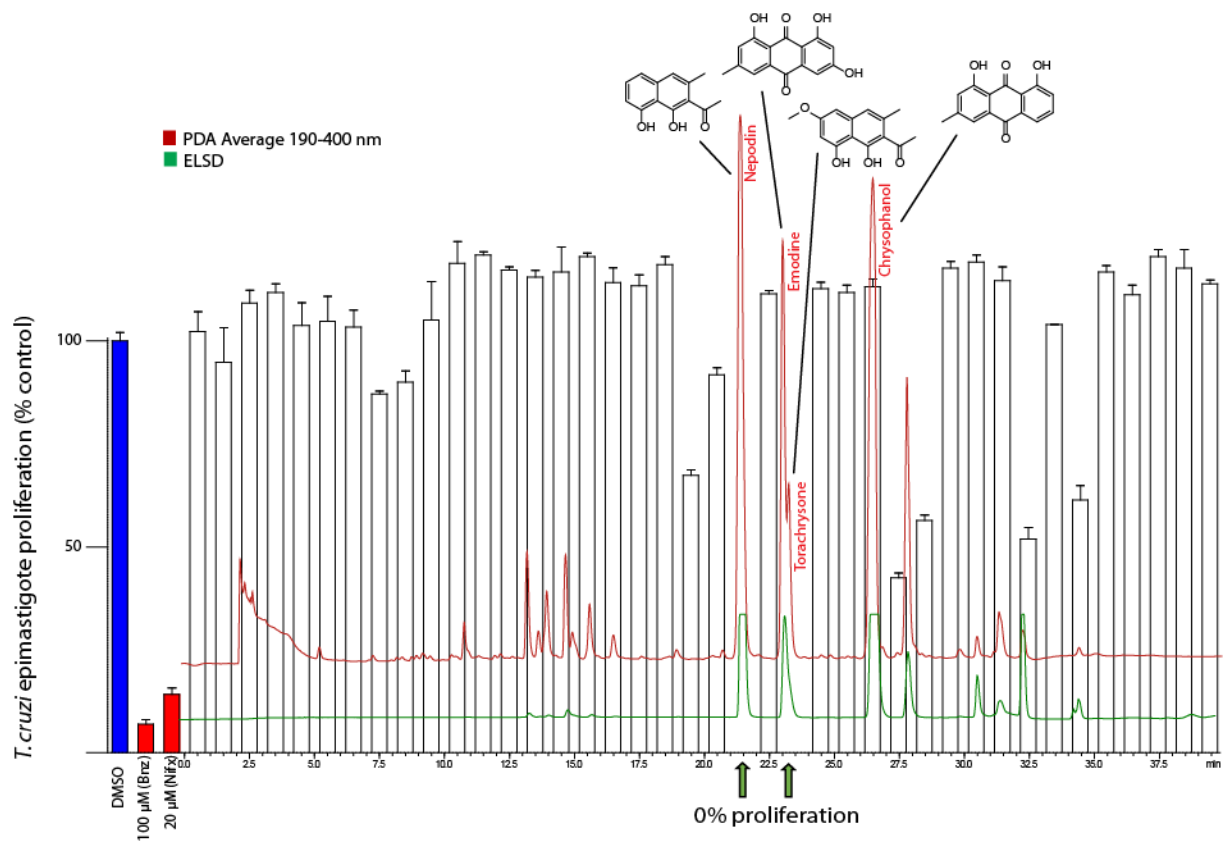

**Figure 7.** Bioactivity-guided microfractionation exemplified by *R. crispus* using photo diode array (PDA) and evaporative light scattering detectors (ELSD). Isolation of antichagasic metabolites was based on epimastigote proliferation inhibition. A limitation of this qualitative approach are false negatives (shown here with chrysophanol) due to low concentrations. Nepodin and emodin/torachryzone were identified and isolated from fully active fractions (0% cell viability), the moderately active chrysophanol was identified in a negative fraction.
